1                    **Npac Is a Co-factor of Histone H3K36me3 and Regulates**  
2                    **Transcriptional Elongation in Mouse ES Cells**

3

4 Sue Yu<sup>1#</sup>, Jia Li<sup>2#</sup>, Guanxu Ji<sup>3</sup>, Zhen Long Ng<sup>1</sup>, Jiamin Siew<sup>1</sup>, Wan Ning Lo<sup>1</sup>, Ying Ye<sup>4</sup>,  
5 Yuan Yuan Chew<sup>1</sup>, Yun Chau Long<sup>1</sup>, Wensheng Zhang<sup>4</sup>, Ernesto Guccione<sup>5</sup>, Yuin Han  
6 Loh<sup>5</sup>, Zhi-Hong Jiang<sup>3</sup>, Henry Yang<sup>2\*</sup>, Qiang Wu<sup>1,3\*</sup>

7 <sup>1</sup> *Department of Biochemistry, Yong Loo Lin School of Medicine, National University*  
8 *of Singapore, 8 Medical Drive, Singapore 117597*

9 <sup>2</sup> *Cancer Science Institute of Singapore, 14 Medical Drive, #12-01 Centre for*  
10 *Translational Medicine, Singapore 117599*

11 <sup>3</sup> *The State Key Laboratory of Quality Research in Chinese Medicine, Macau*  
12 *University of Science and Technology, Block H #704a, Avenida Wai Long, Macau,*  
13 *China*

14 <sup>4</sup> *Cam-Su Genomic Resource Center, Soochow University, Suzhou 215123, China*

15 <sup>5</sup> *Institute of Molecular and Cell Biology, 61 Biopolis Drive, Proteos, Singapore*  
16 *138673*

17

18 # Equal contribution

19 \* Corresponding authors:

20 Henry Yang: [csiyangh@nus.edu.sg](mailto:csiyangh@nus.edu.sg); Qiang Wu: [qw@must.edu.mo](mailto:qw@must.edu.mo)

21

22 **Running title:** *Yu S et al/Npac Regulates Transcriptional Elongation in ES Cells*

23

24 **ORCID Numbers of authors:**

25 Sue Yu: <https://orcid.org/0000-0003-1838-6506>

26 Jia Li: <https://orcid.org/0000-0001-8360-3912>

27 Guanxu Ji: <https://orcid.org/0000-0002-0384-2890>

28 Zhen Long Ng: <https://orcid.org/0000-0001-8154-447X>

29 Jiamin Siew: <https://orcid.org/0000-0001-7968-2742>

30 Wan Ning Lo: <https://orcid.org/0000-0001-8778-0457>  
31 Ying Ye: <https://orcid.org/0000-0002-5028-3112>  
32 Yuanyuan Chew: <https://orcid.org/0000-0002-6116-5330>  
33 Yun Chau Long: <https://orcid.org/0000-0001-5692-0381>  
34 Wensheng Zhang: <https://orcid.org/0000-0002-6876-3173>  
35 Ernesto Guccione: <https://orcid.org/0000-0001-7764-5307>  
36 Yui Han Loh: <https://orcid.org/0000-0002-4715-6454>  
37 Zhi-Hong Jiang: <https://orcid.org/0000-0002-7956-2481>  
38 Henry Yang: <https://orcid.org/0000-0002-1155-8216>  
39 Qiang Wu: <https://orcid.org/0000-0003-2049-1639>

40

41 **Count of Words: 10693**

42 **Count of Figures: 8**

43 **Count of Supplementary Figures: 7**

44 **Count of Supplementary Tables: 5**

45 **Count of Reference: 65**

46 **Count of References from 2014: 9**

47

48

## 49 **Abstract**

50 Chromatin modification contributes to pluripotency maintenance in embryonic stem  
51 cells (ESCs). However, the related mechanisms remain obscure. Here, we show that  
52 Npac, a “reader” of histone H3 lysine 36 trimethylation (H3K36me3), is required to  
53 maintain mouse ESC pluripotency since knockdown of *Npac* causes mouse ESC  
54 differentiation. Depletion of Npac in mouse embryonic fibroblasts (MEFs) inhibits  
55 reprogramming efficiency. Furthermore, our Npac ChIP-seq results reveal that Npac  
56 co-localizes with histone H3K36me3 in gene bodies of actively transcribed genes in  
57 mESCs. Interestingly, we find that Npac interacts with p-TEFb, RNA Pol II Ser2 and  
58 Ser5. Depletion of Npac disrupts transcriptional elongation of pluripotency genes  
59 *Nanog* and *Rif1*. Taken together, we propose that Npac is essential for transcriptional  
60 elongation of pluripotency genes by recruiting of p-TEFb and interacting with RNA  
61 Pol II Ser2 and Ser5.

62

63 **KEYWORDS:** Npac; Pluripotency; Reprogramming; Histone H3K36me3;  
64 Transcriptional elongation

65

## 66 **Introduction**

67 Embryonic stem (ES) cells derived from the inner cell mass of the early embryo are  
68 characterized by self-renewal and pluripotency, the ability to differentiate into many  
69 different cell types [1, 2]. Since ES cells can be cultured indefinitely in vitro, they are  
70 a promising resource for regenerative therapy, in particular ES cells show potential for  
71 treating degenerative diseases such as diabetes and Parkinson’s disease [3, 4].  
72 Moreover, induced pluripotent stem cells (iPSC) showed enormous potential for the  
73 application and progress in gene therapy and regenerative medicine [5-8]. Therefore,  
74 enhanced understanding of molecular mechanisms regulating ES cell identity would  
75 be of great value toward developing ES and iPSC-based therapies.

76

77 Transcription factors Oct4 (encoded by *Pou5f1* gene), Sox2 and Nanog constitute the  
78 core transcriptional network that activates genes that promote pluripotency and  
79 self-renewal and inhibit genes that promote differentiation [9-12]. Yamanaka's  
80 discovery that the combination of transcription factors OKSM (Oct4, Klf4, Sox2 and  
81 c-Myc) was sufficient to reprogram terminally differentiated cells to pluripotent stem  
82 cells further proved the importance of those core transcription factors [7]. Aside from  
83 these, many other transcription factors are essential for pluripotency [13-16].

84

85 Besides transcription factors, chromatin regulators also contribute to mESC  
86 pluripotency through providing the necessary environment for proper gene expression  
87 [17]. Recently, a handful of chromatin regulators that are critical for ES cell  
88 pluripotency were characterized. ES cells contain structurally relaxed and  
89 transcriptionally permissive chromatin that allows for epigenetic remodeling [18].  
90 However, factors that modify this epigenetic configuration are not completely known.  
91 Lysine-trimethylation modifications at histone H3 are the most stable epigenetic  
92 marks on histones. ESCs are featured by higher level of histone H3 lysine 4  
93 trimethylation (H3K4me3), which is generally correlated with gene activation [19].  
94 Conversely, H3K27me3 and H3K9me3 are related to gene silencing and  
95 heterochromatin in ESCs [20]. However, few studies have examined the regulation of  
96 histone H3K36me3 in ES cells [21, 22]. Histone H3K36me3 marks active genes and  
97 preferentially occupies exons and introns (gene bodies) [23] and is considered as a  
98 marker of transcriptional elongation. Recently, a large-scale methyl lysine interactome  
99 study discovered proteins that bind to specific histone marks [24]. Interestingly, all  
100 proteins that bind to histone H3K36me3 have a common PWWP domain. This and  
101 other studies [25-27] suggest the essential role of the PWWP domain in binding to  
102 histone H3K36me3.

103

104 Npac (also known as NP60 and Gylr1) containing a PWWP domain is one of the  
105 proteins that can bind to histone H3K36me3 [24]. ChIP-seq analysis on human  
106 chromosome 22 revealed that both histone H3K36me3 and Npac are exclusively

107 localized at gene bodies [24], suggesting that Npac may function in transcriptional  
108 elongation. Additionally, Npac is a co-factor of LSD2 which mediates histone H3K4  
109 demethylation [28-30]. These findings suggest that Npac regulates gene expression  
110 through interacting with specific histone modifications. However, how Npac plays its  
111 function is largely unknown.

112

113 In this study, we found that Npac is required to maintain mouse ES cell pluripotency.  
114 Depletion of Npac leads to mESC differentiation with loss of pluripotency. Depletion  
115 of Npac also reduces the reprogramming efficiency of MEFs. We observed that Npac  
116 positively regulates pluripotency genes such as *Pou5f1* and *Nanog*. Npac may prevent  
117 mESC differentiation by repressing the MAPK/ERK pathway. Furthermore, ChIP-seq  
118 experiments showed that Npac co-localizes with histone H3K36me3 in the body of  
119 gene which are actively transcribed in mESCs. Npac interacts with RNA Pol II  
120 (including Ser2 and Ser5 phosphorylated RNA Pol II) and p-TEFb, and Npac  
121 depletion causes transcriptional elongation defect of *Nanog* and *Rif1*. Together, these  
122 results establish that Npac maintains mESC pluripotency and regulates transcriptional  
123 elongation in mESCs.

124

## 125 **Results**

### 126 **Npac is required for maintenance of mouse ESC pluripotency**

127 To test whether Npac is associated with ESC pluripotency, we induced mouse ES  
128 cells to differentiate by using ES medium without LIF (leukemia inhibitory factor).  
129 We observed that *Npac* mRNA level was decreased during differentiation, dropping  
130 to around 40% at 5 days after LIF removal (Fig. 1A).

131

132 Next, we depleted Npac by RNAi to determine the role of Npac in ESC pluripotency.  
133 Transfection of mouse ES cells with shRNA plasmids (*Npac* RNAi-1 or RNAi-2)  
134 targeting *Npac* significantly reduced the level of *Npac* mRNA (Fig. 1B,  
135 Supplementary Fig. S1A). We observed that transfection with *Npac* RNAi-1 reduced

136 the mRNA levels of ES cell pluripotency genes *Pou5f1* and *Nanog* significantly (Fig.  
137 1B). Additionally, protein levels of Oct4 and Nanog were also reduced in *Npac*  
138 RNAi-1 transfected ES cells as well as histone H3K36me3 (Fig. 1C). *Pou5f1* and  
139 *Nanog* mRNA expression levels were similarly down-regulated in *Npac* RNAi-2  
140 transfected ES cells (Supplementary Fig. S1A). The reduction of Oct4 and Nanog  
141 upon *Npac* knockdown suggested that *Npac* depletion may cause loss of ES cell  
142 pluripotency since Oct4 and Nanog are master regulators required to maintain ESC  
143 pluripotency [13-15,31]. This was further supported by the evidence that expressions  
144 of lineage marker genes were up-regulated upon loss of *Npac*: trophectoderm marker  
145 *Cdx2* showed 3 fold increment, endoderm markers *Foxa2*, *Gata6* and *Vegfr2*  
146 displayed 2.7, 2.5 and 2 fold increment respectively, while mesoderm markers, *Nodal*,  
147 *Hand1* and *Gata2* increased by 4.2, 4.2 and 5.8 fold respectively (Fig. 1D).  
148 Moreover, *Npac* RNAi transfected ES cells showed morphological differentiation  
149 and weaker alkaline phosphatase (AP) activity compared to control RNAi transfected  
150 cells, while scrambled *Npac* transfected cells appeared to have similar AP activity as  
151 control (Fig. 1E,1F), further indicating that *Npac* depleted cells were undergoing  
152 differentiation.

153

154 In order to ensure the *Npac* RNAi was specific, we performed *Npac* RNAi rescue  
155 experiment. To construct sh*Npac*-resistant *Npac* mutant plasmid, specific primers  
156 were designed and the plasmid of full-length *Npac* cDNA inserted in pCAG-Neo  
157 vector was used as template. We transfected E14 cells with control RNAi or *Npac*  
158 RNAi plasmid and selected with puromycin. We then transfect the cells with *Npac*  
159 RNAi-resistant plasmid to for RNAi rescue. The cells were selected with neomycin  
160 for three days, followed by alkaline phosphatase (AP) staining. We observed sustained  
161 expression level of pluripotency genes *Pou5f1*, *Nanog* and *Sox2* and clearly more AP  
162 positive cells in rescue treatment (*Npac* RNAi-immune OE) than control, showing  
163 that *Npac* RNAi-immune OE cells were resistant to *Npac* RNAi (Supplementary Fig.  
164 S1B, S1C). We observed that the changes of ALP staining and pluripotency gene

165 experssion can only be partially rescued. This is like due to *Npac* RNAi resulted in ES  
166 cell differantion before we transfected *Npac* RNAi-immune OE plasmid into the cells.

167

168 To further confirm the important role of *Npac* in pluripotency maintenance, we  
169 generated embryoid bodies (EBs) from *Npac*-depleted cells and control cells. We  
170 then cultured the EBs in absence of LIF in low-attachment dishes for 14 days. EBs  
171 partially mimic *in vivo* embryonic development [32]. We then performed AP staining  
172 and found that both EBs generated from control RNAi cells and *Npac* RNAi cells lost  
173 pluripotency, while *Npac* RNAi derivated EBs were much smaller than control group,  
174 suggesting that *Npac* depleted EBs grew more slowly than control EBs  
175 (Supplementary Fig. S1D). We also performed qRT-PCR to determine the expression  
176 levels of lineage markers in EBs generated from control RNAi and *Npac* RNAi cells  
177 (Supplementary Fig. S1E). We found that *Npac* expression level in *Npac*-KD EBs  
178 was lower compared to control group. The levels of several mesoderm markers  
179 (*Hand1*, *Gata2* and *Nkx2.5*) were much higher in *Npac*-depleted EBs than that in  
180 control EBs. In addition, endoderm markers (*Sox17*, *Foxa2* and *Vegpr2*) showed  
181 higher level in *Npac*-KD EBs compared to control EBs. These results suggest that the  
182 depletion of *Npac* may drive ES cells to differentiate into endoderm and mesoderm  
183 lineages, which is consistent with the result of *Npac* knockdown in ES cells shown in  
184 Figure 1D.

185

186 Having seen the effect of *Npac* depletion, we next examined whether overexpression  
187 of *Npac* affected ES cell pluripotency and differentiation. To this end, we performed  
188 EB formation assay using *Npac* overexpressing cells. After EB induction, EBs were  
189 collected at 7th and 14th day which mimic early and late development respectively.  
190 We found that *Npac* was expressed at higher level in the embryoid body at the 7th  
191 (Supplementary Fig. S1F) and the 14th day (Supplementary Fig. S1G) in *Npac*  
192 overexpressing EBs. Interestingly, *Oct4* and *Nanog* expression levels were about 2  
193 folds in *Npac* overexpressing EBs compared to normal EBs, suggesting that  
194 pluripotency genes were sustained longer in *Npac* overexpressing EBs. Also, we

195 found the size of Npac OE EBs was bigger than that of control group, suggesting that  
196 Npac overexpression may promote EBs to grow faster than control group  
197 (Supplementary Fig. S1H).

198

199 Based on these results, we conclude that Npac is required to maintain ESC  
200 pluripotency. On one hand, Npac depletion represses pluripotency genes and activate  
201 lineage marker genes. On the other hand, pluripotency gene expression is maintained  
202 upon Npac overexpression in differentiating ES cells.

203

#### 204 **Reprogramming efficiency of MEFs to iPSCs is reduced upon Npac depletion**

205 Because of the essential role of Npac in mouse ES cell pluripotency, we next tested its  
206 role in reprogramming of somatic cells. *Pou5f1*-GFP MEFs were used to facilitate  
207 identification of putative iPSC colonies based on GFP expression [33]. We first  
208 confirmed that *Npac* relative expression was decreased to about 29% of the control  
209 with OKSM only when MEFs were infected with OKSM along with *Npac*  
210 knockdown virus (Fig. 2A). We found that GFP<sup>+</sup> colonies produced by OKSM plus  
211 *Npac* knockdown was 3.5 fold less than the control 14 days later after infection  
212 (Fig.2B). We also confirmed this by checking iPSC colonies with AP staining (Fig.  
213 2C, 2D). In addition, we performed immunostaining to examine whether the iPSCs  
214 generated from OKSM plus *Npac* knockdown induction were pluripotent. We found  
215 that those iPSCs expressed endogenous Oct4 and Nanog, indicating that they were  
216 ES-cell like (Fig. 2E). Further, we generated embryoid bodies from GFP<sup>+</sup> iPSCs  
217 which induced by OKSM+*Npac* KD. Our immunostaining results showed that these  
218 iPSCs could express lineage markers of endoderm (Nestin), mesoderm (SMA) and  
219 ectoderm (Gata4) (Fig. 2F). These results showed that iPSCs generated from OKSM  
220 plus *Npac* knockdown are pluripotent.

221

222 Thus, Npac is essential for not only pluripotency maintenance in mES cells but also  
223 generation of iPSCs.

224



225 **Depletion of Npac represses pluripotency genes while activating development**  
226 **related genes**

227 We next investigated how Npac functions in pluripotency maintenance by profiling  
228 gene expression following shRNA-induced *Npac* knockdown. Global expression  
229 altered genes after *Npac* knockdown were shown in Supplementary Table S2. Upon  
230 *Npac* depletion, 2696 genes were increased by >1.5 fold and 891 genes were  
231 down-regulated (decreased by >1.5 fold) (Fig. 3A). We randomly chose 10  
232 up-regulated and 9 down-regulated genes and tested by qPCR to confirm the gene  
233 expression microarray results (Supplementary Fig. S2A, S2B).

234

235 We carried out Gene Ontology (GO) analysis for activated and repressed genes (Fig.  
236 3A). Full list of the enriched terms is shown in Supplementary Table S3. Among  
237 genes down-regulated by *Npac* knockdown, enriched categories were related to  
238 chromosome modification, suggesting that Npac is required to maintain the unique  
239 chromatin structure in mESCs. Notably, we found a majority of known pluripotency  
240 genes were down-regulated upon *Npac* depletion (Fig.3B). Npac could also play  
241 important roles in cell proliferation and telomere maintenance, since GO terms related  
242 to these were significantly enriched. Among up-regulated genes, many enriched terms  
243 were related to development.

244

245 **Npac regulates the MAPK/ERK pathway to influence mESC pluripotency**

246 Interestingly, many up-regulated genes upon *Npac* depletion were linked to Wnt and  
247 MAPK signaling pathways that are involved in mESC pluripotency (Fig. 3A, 3C).  
248 Nichols et al. reported that suppression of the MAPK/ERK pathway can contribute to  
249 the maintenance of mES cell ground state and pluripotency [34, 35]. Also, the ERK  
250 pathway promotes mES cell differentiation [36]. We found that levels of ERK1/2 and  
251 phosphorylated ERK1/2 (p-ERK1/2) were elevated upon *Npac* depletion (Fig. 3D).  
252 Thus, inhibition of the MAPK/ERK pathway by *Npac* could contribute to the effect of  
253 *Npac* on pluripotency and differentiation.

254

255 To explore the role of the MAPK pathway in *Npac* function, we tested whether  
256 inhibition of the MAPK pathway by ERK inhibitor (PD0325901, Sigma) could rescue  
257 the effect of *Npac* knockdown. We first confirmed that 50 nM/250 nM ERK inhibitor  
258 (PD0325901, Sigma) was able to block the MAPK pathway in E14 ES cells  
259 (Supplementary Fig. S3). We found that the ERK inhibitor did not affect *Npac*  
260 knockdown efficiency (Fig. 3E). However, addition of the ERK inhibitor elevated the  
261 level of *Nanog*. The ERK inhibitor did not rescue the down-regulation of *Pou5f1* by  
262 *Npac* depletion (Fig. 3E). This is in line with the previous finding that ERK pathway  
263 inhibition up-regulates *Nanog* in ES cells [37, 38]. Also, the addition of the ERK  
264 inhibitor reduced the expression levels of lineage markers (Fig. 3F). Finally, *Npac*  
265 depleted cells with or without the ERK inhibitor displayed similar differentiated  
266 morphology.

267

268 Taken together, our results suggest that *Npac* depletion activates the MAPK/ERK  
269 pathway, leading to mESC differentiation. However, since blocking the MAPK/ERK  
270 pathway did not rescue the differentiation phenotype and the down-regulation of  
271 *Pou5f1*, *Npac* likely affects pluripotency also by other unknown mechanisms.

272

### 273 ***Npac* depletion promotes apoptosis**

274 We also observed that many genes related to cell death and apoptosis were  
275 up-regulated when *Npac* was knocked down (Fig. 4A). To evaluate the effect of *Npac*  
276 depletion on cell death, we performed propidium iodide staining and flow cytometry.  
277 FACS analysis found that the percentages of cells in sub-G1 phase were significantly  
278 increased in *Npac* depleted cells compared to the control (Fig. 4B, 4C), suggesting  
279 that there was a sub-G1 phase arrest in the cell cycle. Furthermore, Annexin V  
280 staining assay showed that apoptotic cells increased to 40.3% of the total cell  
281 population upon *Npac* depletion, compared to only 9.9% of the total cell population in  
282 the control (Fig. 4D, 4E). These results indicate that depletion of *Npac* causes  
283 apoptosis.

284

285 **Npac is located at gene bodies and co-occupies genomic sites of histone**  
286 **H3K36me3**

287 Oct4 and Nanog are master regulators in the pluripotency transcriptional network [13].  
288 Since depletion of *Npac* down-regulates *Nanog* and *Oct4*, we tested whether Npac is  
289 located to *Pou5f1* and *Nanog* promoters using chromatin immunoprecipitation (ChIP).  
290 Interestingly, we found enrichment for Npac in introns and exons (here defined as the  
291 gene body) of *Nanog* but not the promoter (Fig. 5A, 5B). Also, we did not observe  
292 any enrichment within the promoter of *Pou5f1* (Supplementary Fig.S4). Similarly, we  
293 also found enrichment in the gene bodies of other pluripotent genes such as *Tcf15*,  
294 *Prdm14* and *Tcl1* (Fig. 5C).

295  
296 To determine the genome-wide distribution of Npac in ES cells, we conducted a  
297 ChIP-seq experiment using anti-Npac antibody. We identified 12414 potential  
298 genomic sites of Npac where 2416 genes were mapped, of which 57.24% sites were  
299 located within gene bodies (the global binding sites of Npac were shown in  
300 Supplementary Table S4). Additionally, 41.95% of the sites were within transcription  
301 termination sites (TTS), followed by 0.66% and 0.15% respectively mapped to  
302 intergenic and transcription start sites (TSS) (Fig. 5D). Gene ontology analysis  
303 showed the genes that Npac binds to are linked to development, transcription,  
304 chromatin modification, cell cycle and RNA processing (Supplementary Table S5).

305  
306 Since Npac is a cofactor of LSD2 which demethylates histone H3K4me1 and  
307 H3K4me2, we were also interested in the relationship between Npac and histone  
308 H3K4me2. Indeed, we found that the genome-wide profile of Npac localization was  
309 inversely correlated to that of histone H3K4me2 (Supplementary Fig. S5A). We were  
310 also keen to explore whether Npac is linked to other histone modifications. Here, we  
311 chose several important histone modifications (histone H3K9me3, histone H3K27me3  
312 and histone H3K4me3) (Supplementary Fig. S5B) and their respective modifiers (Eset,  
313 Ezh2 and MLL2) (Supplementary Fig. S5C), as well as ESC-enriched transcription  
314 factors (TFs) (Oct4, Nanog and Sox2) (Supplementary Fig. S5D) to compare their

315 binding with that of Npac. We found that Npac binding profile displayed unique  
316 pattern compared to those epigenetic modifiers, histone modification and  
317 ESC-enriched TFs. In general, Npac-associate genes (most are active genes) are much  
318 less than that of others. Further, Npac, unlike Eset, Ezh2 and MLL2 (mainly located at  
319 TSS sites), is enriched in gene bodies and 3' ends. Thirdly, Npac shares some genomic  
320 loci with master TFs Oct/Nanog/Sox2 but the genomic locations of these three TFs  
321 are clearly different from that of Npac.

322

323 Npac is a putative reader of histone H3K36me3 together with which Npac are present  
324 almost exclusively over gene bodies [24]. We found that in mESCs, the genome-wide  
325 distribution of Npac resembled that of histone H3K36me3, and both of them were  
326 enriched at expressed genes in E14 ES cells, which displayed absence from the  
327 transcription start sites (TSS), but gradually increased from gene bodies to  
328 transcription termination sites (TTS), while had low or even no binding at inactive  
329 genes in E14 ES cells (Fig. 5E). Further, we separated genes into 4 groups (high,  
330 middle, low and no) according to their gene expression levels. The results also  
331 showed similar genome-wide distribution between Npac and H3K36me3, which  
332 displayed most enriched at genes with high expression, but lower binding in genes  
333 with lower expression (Fig. 5F). This further indicates that Npac and H3K36me3 are  
334 enriched in actively transcribed genes in E14 ES cells. Indeed, we observed that both  
335 histone H3K36me3 and Npac had high occupancies in actively transcribed genes,  
336 such as housekeeping gene *ActinB*, pluripotency genes *Nanog*, *Nucleolin* and *Tcl1*  
337 (Fig. 5G), and telomere maintenance related genes *Rfc1*, *Terf1* and *Rpa2* (Fig. 5H).  
338 On the other hand, we observed clearly low Npac and histone H3K36me3  
339 occupancies on inactive genes. These genes included developmental genes  
340 (Supplementary Fig. S6A), MAPK pathway related genes (Supplementary Fig. S6B)  
341 and cell death related genes (Supplementary Fig. S6C). Taken together, these results  
342 show that Npac co-localizes with histone H3K36me3 in gene bodies of active genes  
343 in mES cells, suggesting that Npac plays roles in histone H3K36me3-associated  
344 cellular functions including gene activation and transcriptional elongation.

345

346 **Npac is likely involved in transcriptional elongation**

347 Next, we examined how Npac is involved in transcriptional elongation. We found that  
348 Npac can interact with RNA Pol II (Fig. 6A). This result is in line with the previous  
349 report that LSD2 complex may include Pol II and Npac [28]. Next, we found that  
350 Npac can also associate with Ser2 and Ser5 phosphorylated RNA pol II (Fig. 6B, 6C).  
351 In addition, we found that phosphorylation levels of Ser2 and Ser5 were  
352 down-regulated upon Npac depletion, while RNA Pol II expression was not affected  
353 (Fig. 6D). This suggests that the interaction of Npac with phosphorylation Ser2 and  
354 Ser5 may affect their expression and function. Given that Ser5 phosphorylation is  
355 associated with transcriptional initiation and early elongation while Ser2  
356 phosphorylation correlates with transcriptional elongation [39], we propose that Npac  
357 affects transcriptional elongation through associating with RNA Pol II  
358 phosphorylation Ser2 and Ser5.

359

360 In order to determine whether Npac is essential for RNA Pol II elongation in mouse  
361 ESCs, we performed ChIP with RNA Pol II, RNA Pol II Ser5 and RNA Pol II Ser2 in  
362 Npac depleted cells and control cells. We performed ChIP-qPCR for the gene bodies  
363 of two pluripotency genes *Nanog* and *Rif1*, and *Utrn*, a gene up-regulated in Npac  
364 depleted cells. We found that the presence of RNA Pol II and RNA Pol II Ser2 at gene  
365 bodies of *Nanog* (Fig. 6E, 6G) and *Rif1* (Fig. 6F, 6H) was significantly reduced in  
366 *Npac* knockdown cells, while their presence at *Utrn* (Supplementary Fig. S7A, S7B)  
367 was not significantly changed. In addition, the level of H3K36me3 was also reduced  
368 at gene bodies of *Nanog* (Fig. 6I) and *Rif1* (Fig. 6J) in Npac depleted cells. However,  
369 the binding of RNA Pol II Ser5 at gene bodies of *Nanog* (Supplementary Fig. S7C)  
370 and *Rif1* (Supplementary Fig. S7D) was similar between Npac depleted cells and  
371 control cells, suggesting RNA Pol II Ser5 binding is independent of Npac. Taken  
372 together, these results suggest that Npac promotes transcriptional elongation. But it  
373 does not affect transcriptional initiation.

374

## 375 **Npac associates with p-TEFb to promote transcriptional elongation**

376 Next, we observed that Npac could interact with transcriptional elongation factor b  
377 (p-TEFb), which is composed of Cyclin T1 and Cdk9 (Fig. 7A, 7B). p-TEFb can  
378 phosphorylate the carboxyl-terminal domain (CTD) of the large subunit of RNA  
379 polymerase II, thus promoting transcriptional initiation and elongation [40]. Thus,  
380 Npac could act as an essential component of the elongation complex. To test whether  
381 Npac is required for transcriptional elongation, we performed elongation recovery  
382 assay to measure the recovery of transcription at different positions of two genes  
383 (*Nanog* and *Rif1*). We incubated ESCs with 100  $\mu$ M  
384 5,6-Dichloro-1- $\beta$ -D-ribofuranosylbenzimidazole (DRB) which is widely used as an  
385 elongation inhibitor [41]. After three hours, ESCs were washed twice with PBS and  
386 cultured with fresh medium before total RNA was isolated in every 5 minutes (Fig.  
387 7C) [37]. We first confirmed that *Npac* knockdown efficiency was not affected by  
388 addition of DRB in *Npac* depleted cells, which showed about 40% *Npac* mRNA  
389 compared to the control (Fig. 7D). Next, we examined transcripts from *Nanog* and  
390 *Rif1* at different positions after release from the elongation block. Following the  
391 release, transcriptional output at the exon 1 of *Nanog* and exon 2 of *Rif1* was not  
392 significantly affected by *Npac* RNAi (Fig. 7G, 7I). However, in *Npac*-depleted cells,  
393 the recovery of transcription at downstream regions (exon 4 region of *Nanog* and  
394 exon 30 of *Rif1*) was significantly reduced compared to the control (Fig. 7F, 7J).  
395 Taken together, these results suggest that *Npac* depletion causes transcriptional  
396 elongation defect of *Nanog* and *Rif1*.

397

## 398 **Discussion**

399

400 Mouse ESC pluripotency is governed by both genetic and epigenetic mechanisms.  
401 Many pluripotency factors including transcription factors and epigenetic regulators  
402 have been discovered in ES cells [42]. Our results indicate that *Npac* is required to  
403 maintain pluripotency in mouse ES cells. First, we found that depletion of *Npac*

404 significantly repressed expression of master pluripotency factors Oct4 and Nanog.  
405 Besides these core factors, many other known ESC pluripotency factors were also  
406 decreased upon Npac depletion according to gene expression microarray. Among  
407 these, *Tet1* is specifically expressed in ESCs and required for ES cell maintenance  
408 [43]. *Tcl1*, a cofactor of the Akt1 kinase, is essential for self-renewal of ES cells [44].  
409 Also, KDM5B, a histone H3 trimethyl lysine 4 (H3K4me3) demethylase, is an  
410 activator of ESC self-renewal correlated genes [45]. Second, transient knockdown of  
411 Npac increased expression of mesoderm and endoderm lineage markers and reduced  
412 alkaline phosphatase activity. These results further support the assertion that Npac is  
413 required for maintaining ES cell in an undifferentiated state. Third, we found that loss  
414 of Npac activated the MAPK signaling pathway (Fig. 3A, 3D). ERK signalling  
415 pathway can induce ES cell differentiation into all germ layers *in vitro* [46, 47]. In  
416 addition, activation of ERK represses Nanog expression and causes ES cell  
417 differentiation into primitive endoderm [48]. It is intriguing that *Npac* knockdown  
418 leads mESCs to differentiation but ERK inhibitors did not fully rescue the  
419 differentiation phenotype. It is noteworthy that ERK inhibitors can block general ESC  
420 differentiation and thus may mask true differentiation defects of Npac-depleted ESCs.  
421 Thus ERK inhibitors might not be specific to rescue the phenotype resulted from  
422 Npac depletion. Therefore, though it is possible that reduction of *Nanog* upon Npac  
423 depletion was partially caused by the activation of ERK pathway, this is unlikely to be  
424 the sole mechanism. We surmise that Npac depletion also results in changes in  
425 chromatin state, RNA-binding and cell metabolism, some of which may be  
426 non-reversible. It is highly likely that Npac regulates pluripotency using some other  
427 unknown mechanisms which will be interesting to be further explored.

428

429 Furthermore, the function of Npac in somatic reprogramming verified its essential  
430 role in pluripotency. There are several possible ways in which Npac depletion inhibits  
431 reprogramming process. Reprogramming consists of a set of molecular processes that  
432 transform a somatic cell into a pluripotent stem cell. In the process of reprogramming,  
433 genes related to differentiated state should be repressed first and markers associated

434 with pluripotency will be activated subsequently. Meanwhile, widespread chromatin  
435 remodelling occurs during the whole process [49, 50]. Our microarray results showed  
436 that *Npac* depletion activates many development associated genes (Fig. 3A) and  
437 down-regulates a subset of pluripotency genes. Thus, reprogramming may be blocked  
438 initially by high expression of somatic genes. It has been demonstrated that active  
439 marks such as H3K4me2/3 can cause chromatin to be in “open” state and thus  
440 enhance iPSC formation, while repressive marks such as H3K9me and H3K27me  
441 function in opposite way and impair iPSC formation [50]. Given that H3K36me3 is a  
442 mark classically associated with active transcription, we can predict that active  
443 H3K36me3 marks may promote reprogramming. Thus the fact that *Npac* knockdown  
444 causes down-regulation of H3K36me3 (Fig. 1C) could be a reason why iPSC  
445 formation is inhibited. In addition, GO analysis of microarray and ChIP-seq revealed  
446 that *Npac* targets many genes that are associated with chromatin modification and  
447 nucleosome assembly (Fig. 3A). Therefore, this provides additional evidence that  
448 *Npac* depletion may impair reprogramming by inhibiting permissive chromatin state.  
449 Finally, inhibition of the ERK pathway not only enables maintenance of mouse ES  
450 cells in ground pluripotent state, but also can enhance somatic reprogramming [35,  
451 51]. Therefore, lower reprogramming efficiency in *Npac* knockdown MEFs could also  
452 be affected by activation of the ERK pathway.

453

454 We found that *Npac* depletion can increase cellular apoptosis (Fig. 4B, 4D). The  
455 mechanisms of apoptosis have been elucidated in numerous studies, classically  
456 includes both extrinsic and intrinsic pathways [52]. Among them, the ERK pathway  
457 and p53-dependent apoptosis are two important mechanisms. ERK activity can boost  
458 apoptotic pathways by activation of caspase-8 [53]. Thus, the fact that *Npac* depletion  
459 increases expression of ERK (Fig. 3D) and *caspase-8* (gene expression microarray  
460 results) could explain apoptosis caused by loss of *Npac*. p53 causes apoptosis by  
461 transcription-dependent and independent mechanisms [54]. Therefore, apoptosis  
462 could be induced by affecting p53 downstream targets. Indeed, we observed an  
463 up-regulation of *PERP* expression in microarray (Fig. 4A), which is a proapoptotic



464 gene targeted by p53 [55]. APAF-1 is another protein up-regulated upon Npac  
465 knockdown according to our microarray result. APAF-1 is a component of the  
466 apoptotic machinery activated by p53. Because of the unique abbreviated cell cycle of  
467 mouse ES cells, mESCs display a different mechanism of cell cycle arrest and  
468 apoptosis compared to somatic cells. Our results showed that Npac-depleted ES cells  
469 arrest in the sub-G1 phase (Fig. 4B), this could be another reason that ES cells  
470 undergo apoptosis upon Npac depletion. Taken together, our results suggest that Npac  
471 depletion causes apoptosis through the p53-dependent pathway and the ERK pathway.

472

473 We found that Npac is co-localized with transcriptional elongation mark histone  
474 H3K36me3 in gene bodies of actively transcribed genes in ESCs (Fig. 5E, 5F). This is  
475 consistent with the finding from a study in human Hela cells [24]. However, it  
476 remains unclear whether recruitment of Npac depends on the localization of histone  
477 H3K36me3. Given that Npac predominantly occupies actively transcribed genes (Fig.  
478 5G, 5H), it appears that Npac functions as a transcriptional activator of those actively  
479 transcribed genes (such as pluripotency genes and telomere maintenance genes) in  
480 mouse ES cells. Moreover, we observed that global level of RNA Pol II Ser2 was  
481 reduced, while total RNA Pol II was unaffected when Npac was depleted (Fig. 6D).  
482 There is a possibility that the lower level of phosphorylated RNA Pol II in Npac  
483 depleted cells makes elongation process slower or even blocks transcriptional  
484 elongation, therefore most of the active genes in mouse ES cells were down-regulated  
485 upon Npac depletion. In addition, the binding of RNA Pol II and RNA Pol II Ser2 at  
486 pluripotency genes *Nanog* and *Rif1* were significantly reduced upon Npac depletion,  
487 while the binding of RNA Pol II Ser5 at these two genes was not significantly  
488 changed. These further confirmed that Npac is required for transcriptional elongation.

489

490 In mammalian cells, Ser2 of RNA Pol II can be phosphorylated by the Cdk9 kinase  
491 subunit of p-TEFb, which results in transiting elongation initiation to productive  
492 elongation [56]. According to previous studies, some specific activators, such as DNA  
493 or RNA bound activators and co-activators can recruit p-TEFb to transcription units.

494 For example, one chromatin remodelling protein Brd4 recruits p-TEFb to stimulate  
495 RNA polymerase II-dependent transcription [57]. Given the association of Npac with  
496 p-TEFb in our study (Fig. 7A, 7B), it is possible that Npac may recruit p-TEFb to  
497 chromatin and further results in successful elongation of transcription of target genes.  
498 This is in concert with the observation that Npac depletion caused transcriptional  
499 elongation defect for pluripotency genes *Nanog* and *Rif1*. However, this may not be  
500 the sole reason. Lower enrichment of histone H3K36me3 and RNA Pol II Ser2 upon  
501 Npac depletion may also contribute to transcriptional elongation defect. Taken  
502 together, these imply an essential role of Npac in elongation process.

503

504 Interestingly, according to our Npac gene expression microarray results, we found  
505 there are more upregulated than down regulated genes upon Npac depletion. This  
506 appears to be contrary to the fact that Npac is associated with actively transcribed  
507 genes. However, we think *Npac* knockdown in ESCs results in differentiation and  
508 triggers significant upregulation of abundant developmental genes which are silenced  
509 in undifferentiated ESCs. During the differentiation process, active pluripotency genes  
510 become inactivated meanwhile silenced developmental genes are activated. Since the  
511 number of activated developmental genes is bigger than that of inactivated  
512 pluripotency genes, there are more upregulated genes than downregulated genes upon  
513 Npac depletion. Further, the activation of MAPK pathway caused by *Npac*  
514 knockdown will trigger many differentiation-related genes. Last but not least, the  
515 upregulation of developmental genes in *Npac* knockdown cells is probably  
516 independent of Npac-mediated transcription elongation and it could be triggered by  
517 ES cell differentiation. Nevertheless, given that Npac may have diverse functions, it is  
518 of interest to further explore how Npac plays its role in gene regulation during ES cell  
519 differentiation.

520

521 In summary, we propose a model that Npac regulates mESC pluripotency and  
522 influence transcriptional elongation by interaction with p-TEFb, RNA Pol II Ser2 and  
523 Ser5 (Fig.8A, 8B).

524

## 525 **Material and methods**

### 526 **Cell culture**

527 In this study, mouse E14 ES cells (ATCC® CRL-1821™, Manassas, VA), SNL feeder  
528 cells (CBA-316, Cell Biolabs. San Diego, CA), Platinum-E cells (Plat-E) (RV-101,  
529 Cell Biolabs. San Diego, CA) and *Oct4-GFP* mouse embryonic fibroblasts (MEFs)  
530 were cultured in a 37°C CO<sub>2</sub> incubator with 5% CO<sub>2</sub> as previously described [58].

531

### 532 **Construction of plasmids**

533 Plasmids for shRNA-1 and shRNA-2 targeting *Npac* were designed using Eurofins  
534 MWG Operon siMAX™ software. Oligonucleotides were inserted into pSuper.puro  
535 vector (VEC-pBS-0008, Oligoengine. Seattle, WA). The primers for *Npac*  
536 overexpression were designed by Primer 5 software to amplify full length cDNA of  
537 mouse *Npac/Glyr1* (NM\_028720.2) and the PCR product was inserted into Bgl II and  
538 Mlu I site of pPyCAGIP vector. To construct retrovirus packaging plasmids,  
539 full-length *Npac/Glyr1* cDNA was ligated into MluI and NotI restriction sites of  
540 pMXs plasmid (18656, Addgene. Watertown, MA). To construct *Npac* mutant plasmid  
541 that produces functional *Npac* protein but was resistant to *Npac* RNAi targeting,  
542 specific primers were designed with silent mutations in protein coding domain  
543 sequence. The *Npac* mutant plasmid was generated according to the manual of Q5®  
544 Site-Directed Mutagenesis Kit (E0554S, New England Biolabs. Ipswich, MA). The  
545 plasmid of full-length *Npac* cDNA inserted in pCAG-Neo vector was used as PCR  
546 template. The sequences of the primers were shown in Supplementary Table 1.

547

### 548 **Transfection, RNA extraction, reverse transcription and real-time PCR**

549 Transfection was conducted using Lipofectamine 2000 (11668019, Invitrogen.  
550 Waltham, MA) according to the protocol. Cells were selected by 1 µg/ml puromycin  
551 for 4 days after transfection. Either protein or RNA was then extracted from the cells.  
552 RNA extraction, reverse transcription and real-time PCR were performed as

553 previously described [58]. Sequences of qPCR primers were shown in Supplementary  
554 Table S1.

555

#### 556 **Gene expression microarray analysis**

557 Mouse ES cells (E14) were transfected with *Npac* knockdown plasmid or control  
558 plasmid and cultured for 4 days with selection. RNA was then extracted from the cells.  
559 Gene expression microarray data were analyzed as previously described [58,59]. The  
560 microarray results have been deposited to NCBI GEO (GSE93296).

561

#### 562 **Chromatin immunoprecipitation (ChIP) assay and ChIP-sequencing (ChIP-seq)**

563 Chromatin immunoprecipitation (ChIP) assay and ChIP-sequencing (ChIP-seq) were  
564 conducted as previously described [58,59]. Antibodies used for ChIP were: anti-*Npac*  
565 (14833-1-AP, Proteintech Group, Rosemont, IL), anti-histone H3K36me3  
566 (ab9050, Abcam, Cambridge, UK), anti-RNA polymerase II CTD repeat YSPTSPS  
567 (phospho S2) (ab5095, Abcam, Cambridge, UK), anti-RNA polymerase II CTD repeat  
568 YSPTSPS (phospho S5) (ab140509, Abcam, Cambridge, UK). The ChIP-seq results  
569 have been deposited to NCBI GEO (GSE95671).

570

#### 571 **Bioinformatics Analysis**

572 *Npac* ChIP-seq reads were mapped to the mouse genome (NCBI37/mm9) using  
573 Burrows-Wheeler Aligner mapping software [60]. After removing duplicate reads, the  
574 mapped results identified board peaks with MACS2. For location classification,  
575 ChIP-seq peaks were annotated by comparing the locations of all transcription start  
576 sites and terminal sites in mouse genome with Perl scripts. (10 kb-1 kb upstream of  
577 the TSS site defined as upstream, 1 kb upstream of the TSS to the TSS site defined as  
578 TSS, regions between the TSS site and the TTS site defined as gene body, 1 kb  
579 downstream of the TTS to the TTS site defined as TTS, 10 kb-1 kb downstream of the  
580 TTS site defined as downstream).

581

582 H3K36me3 ChIP-seq (ENCSR000CGR), H3K4me3 ChIP-seq (GSM1258237) and its

583 modifier MLL2 ChIP-seq (GSM1258241), H3K9me3 ChIP-seq and its modifier Eset  
584 ChIP-seq (GSM440256), H3K27me3 ChIP-seq (GSM1199184 & GSM1199185) and  
585 its modifier EZH2 ChIP-seq (GSM1199182 & GSM1199183), Oct4 ChIP-seq  
586 (GSE65093), Nanog ChIP-seq (GSM915363) and Sox2 ChIP-seq (GSM1179561) on  
587 mouse E14 ES cells downloaded from ENCODE were chosen as datasets to compare  
588 with Npac ChIP-seq.

589

590 E14 RNA-seq (GSM1276712) was also downloaded from ENCODE. We used STAR  
591 software [61] to carry out the RNA-seq mapping with the mm9 genome. By analyzing  
592 the mapped RNA-seq data, featureCounts [62] was used to obtain the gene expression  
593 of E14 sample. All genes were further separated into two groups based on whether the  
594 genes are expressed or not. Genes were also classed into 4 groups based on their  
595 expression levels (high, middle, low and no). Expression levels were classed  
596 according to the number of reads that mapping to mm9 genome. Reads=0 represents  
597 non\_express, while reads > 0 represents express.  $0 < \text{reads} \leq 10$  represents low  
598 expression,  $10 < \text{reads} \leq 100$  represents middle expression, reads > 100 represents  
599 high expression. With the respective gene lists and mapped ChIP-seq files, heatmap  
600 and average reads distribution were generated with ngsplot [63].

601

## 602 **Western blot**

603 Western blot was performed as described [58,59]. Primary antibodies used in this  
604 study were: anti-Npac (14833-1-AP, Proteintech Group. Rosemont, IL), anti-NP60  
605 (sc-390601, Santa Cruz. Dallas, TX), anti- $\beta$ -actin (sc-81178, Santa Cruz. Dallas, TX),  
606 anti-Oct4 (sc-8628, Santa Cruz. Dallas, TX), and anti-Nanog (sc-33760, Santa Cruz.  
607 Dallas, TX), anti-Sox2 (sc-99000, Santa Cruz. Dallas, TX), anti-p-ERK (4370, Cell  
608 Signaling. Danvers, MA), anti-ERK (137F5, Cell Signaling. Danvers, MA),  
609 anti-histone H3K36me3 (ab9050, Abcam. Cambridge, UK), anti-Pol II (sc-899, Santa  
610 Cruz. Dallas, TX), anti-RNA polymerase II CTD repeat YSPTSPS (phospho S2)  
611 (ab5095, Abcam. Cambridge, UK), anti-RNA polymerase II CTD repeat YSPTSPS  
612 (phospho S5) (ab140509, Abcam. Cambridge, UK), anti-Cyclin T1 (sc-10750, Santa

613 Cruz. Dallas, TX), anti-Cdk9 (sc-484, Santa Cruz. Dallas, TX), anti-mouse IgG  
614 (sc-2025, Santa Cruz. Dallas, TX), anti-goat IgG (sc-2028, Santa Cruz. Dallas, TX)  
615 and anti-rabbit IgG (sc-2027, Santa Cruz. Dallas, TX).

616

### 617 **Alkaline phosphatase (AP) staining**

618 Alkaline phosphatase (AP) staining was conducted with Alkaline Phosphatase  
619 Detection Kit (SCR004, Millipore. Burlington, MA) as described in the  
620 manufacturer's protocol. Axio Observer A1 inverted light microscope (Zeiss.  
621 Gottingen, Germany) was used to take pictures for AP staining results.

622

### 623 **Co-immunoprecipitation**

624 Cells were lysed in cell lysis buffer (50 mM Tris-HCl pH 8.0, 1 mM  
625 ethylenediaminetetraacetic acid (EDTA), 150 mM sodium chloride (NaCl), 1% NP-40,  
626 10% glycerol) with protease inhibitor (4693159001, Roche. Basel, Switzerland) and  
627 rotated for 1 hour at 4°C. After precleared by protein G beads (15920010, Invitrogen.  
628 Waltham, MA) for 2 hours at 4°C, the cell lysate was incubated overnight with beads  
629 bound by specific antibodies at 4°C. Then beads were washed four times with cell  
630 lysis buffer and heated in 2X loading dye for 10 minutes at 95°C. The supernatant was  
631 used for Western blotting with specific antibodies. IgG antibody (12-371, Chemicon.  
632 Temecula, CA) was used for control IP.

633

### 634 **Retrovirus packaging and infection**

635 Retrovirus packaging and infection were carried out as before [58]. Briefly, pMXs  
636 retroviral plasmids or pSUPER.retro.puro plasmids were transfected into Plat-E cells.  
637 The cells were selected with 1 µg/ml puromycin (P8833, Sigma-Aldrich. St. Louis,  
638 MO) and 10 µg/ml blasticidin (A1113902, Life Technologies. Carlsbad, CA) for 36 to  
639 48 hours. Retroviruses were harvested and concentrated with centrifugal filter units  
640 (C7715, Millipore Burlington, MA). *Pou5f1-GFP* MEFs were seeded into 24-well  
641 plates for 6 hours and then infected with retroviruses. Infected MEFs were seeded  
642 onto SNL feeder layers 2 days after infection and cultured with mESC medium

643 without LIF until the 5<sup>th</sup> day post infection. The MEFS were then cultured with KSR  
644 medium from 6<sup>th</sup> day after infection. Numbers of GFP<sup>+</sup> colonies were recorded daily  
645 until day 14. AP staining assays were also conducted at day 14.

646

#### 647 **Annexin V-FITC apoptosis assay**

648 Annexin V-FITC apoptosis assay was carried out as described in manufacturer's  
649 protocol (APOAF, Sigma. St. Louis, MO). After transfected with *Npac* RNAi or  
650 control RNAi plasmid in 6-well dishes and selected for 4 days. The cells were stained  
651 with Annexin V FITC and propidium Iodide. The cells were then analyzed by flow  
652 cytometer (BD FACSCanto. BD Biosciences. San Jose, CA).

653

#### 654 **Cell cycle analysis**

655 Cell cycle analysis was conducted as before [58]. Briefly, ES cell were transfected  
656 with *Npac* RNAi plasmid or control plasmid and selected with puromycin for 4 days.  
657 Then cells were stained with 50 µg/ml propidium iodide and then analyzed by the  
658 flow cytometer (BD FACSCanto. San Jose, CA) using Flowing Software 2.5.0.

659

#### 660 **Transcription elongation assay**

661 Transcriptional elongation assay was carried out as previously described [64, 65]. E14  
662 cells were transfected with *Npac* RNAi-1 or control RNAi. After 24 hours cells were  
663 treated with 100 µM 5,6-dichloro-1-bold beta-D-ribofuranosylbenzimidazole (DRB)  
664 (287891, Sigma St. Louis, MO) for 3 hours, washed twice with PBS and cultured in  
665 fresh medium for different durations (5 min to 45 min). Total RNA was extracted and  
666 qRT-PCR was performed to quantify relative expression level changes at different  
667 regions along the *Rif1* and *Nanog* genes. Gene expression levels were normalized  
668 against β-actin. Sequences of used primers were listed in Supplementary Table S1.

669

#### 670 **Statistical analyses**

671 All experiments were conducted in triplicates. Student's t-test was applied for  
672 statistical analysis and the results were mean±SE. P<0.05 was considered significant.

673 Significance: \*  $P \leq 0.05$ , \*\*  $P \leq 0.01$ , \*\*\*  $P \leq 0.001$ .

674

#### 675 **Data availability**

676

677 The *Npac* RNAi microarray results have been deposited to NCBI GEO (GSE93296).

678 The *Npac* ChIP-seq results have been deposited to NCBI GEO (GSE95671).

679

#### 680 **Authors' contributions**

681 QW and HY conceived and designed the experiments. SY, JL, GJ performed the  
682 experiments and analysed the data. ZLN, JS, WNL, YY, YYC, YCL, WZ, EG, YHL  
683 and ZHJ contributed reagents/materials/analysis tools. SY, JL and QW wrote the  
684 manuscript. SY, WZ and QW revised the paper. All authors read and approved the  
685 final manuscript.

686

#### 687 **Competing interests**

688 The authors have declared that no competing interests exist.

689

#### 690 **Acknowledgments**

691 We thank Dr. Takao Inoue for critical reading of the manuscript. We thank Professor  
692 Huck Hui Ng for providing *Oct4-GFP* MEFs. This work was supported by Singapore  
693 National Medical Research Council (CBRG14nov065) and Macau Science and  
694 Technology Development Fund (FDCT-18-033-SKL-016A).

695

#### 696 **References**

697

698 [1] Evans MJ, Kaufman MH. Establishment in culture of pluripotential cells from  
699 mouse embryos. *Nature* 1981;292:154-6.

700 [2] Martin GR. Isolation of a pluripotent cell line from early mouse embryos cultured



701 in medium conditioned by teratocarcinoma stem cells. Proc Natl Acad Sci  
702 1981;78:7634-8.

703 [3] Keller G. Embryonic stem cell differentiation: emergence of a new era in biology  
704 and medicine. Genes Dev 2005;19:1129-55.

705 [4] Smith A. Cell therapy: in search of pluripotency. Curr Biol 1998;8:802-4.

706 [5] Vitale AM, Wolvetang E, Mackay-Sim A. Induced pluripotent stem cells: a new  
707 technology to study human diseases. Int J Biochem Cell Biol 2011;43:843-6.

708 [6] Amabile G, Meissner A. Induced pluripotent stem cells: current progress and  
709 potential for regenerative medicine. Trends Mol Med 2009;15:59-68.

710 [7] Takahashi K, Yamanaka S. Induction of pluripotent stem cells from mouse  
711 embryonic and adult fibroblast cultures by defined factors. Cell 2006;126:663-76.

712 [8] Yu J, Vodyanik MA, Smuga-Otto K, Antosiewicz-Bourget J, Frane JL, Tian S, et al.  
713 Induced pluripotent stem cell lines derived from human somatic cells. Science  
714 2007;318:1917-20.

715 [9] Nichols J, Zevnik B, Anastassiadis K, Niwa H, Klewe-Nebenius D, Chambers I, et  
716 al. Formation of pluripotent stem cells in the mammalian embryo depends on the POU  
717 transcription factor Oct4. Cell 1998;95:379-91.

718 [10] Avilion AA, Nicolis SK, Pevny LH, Perez L, Vivian N, Lovell-Badge R.  
719 Multipotent cell lineages in early mouse development depend on SOX2 function.  
720 Genes Dev 2003;17: 126-40.

721 [11] Chambers I, Colby D, Robertson M, Nichols J, Lee S, Tweedie S, et al.  
722 Functional expression cloning of Nanog, a pluripotency sustaining factor in  
723 embryonic stem cells. Cell 2003;113:643-55.

724 [12] Mitsui K, Tokuzawa Y, Itoh H, Segawa K, Murakami M, Takahashi K, et al. The  
725 homeoprotein Nanog is required for maintenance of pluripotency in mouse epiblast  
726 and ES cells. Cell 2003;113:631-42.

727 [13] Young RA. Control of the embryonic stem cell state. Cell 2011;144:940-54.

728 [14] Jaenisch R, Young R. Stem cells, the molecular circuitry of pluripotency and  
729 nuclear reprogramming. Cell 2008;132: 567-82.

730 [15] Yeo JC, Ng HH. The transcriptional regulation of pluripotency. Cell Res

731 2013;23:20-32.

732 [16] De Los Angeles A, Ferrari F, Xi R, Fujiwara Y, Benvenisty N, Deng H, et al.  
733 Hallmarks of pluripotency. *Nature* 2015;525:469-78.

734 [17] Mattout A, Meshorer E. Chromatin plasticity and genome organization in  
735 pluripotent embryonic stem cells. *Curr Opin Chem Biol* 2010;22:334-41.

736 [18] Efroni S, Duttagupta R, Cheng J, Dehghani H, Hoepfner DJ, Dash C, et al.  
737 Global transcription in pluripotent embryonic stem cells. *Cell Stem Cell*  
738 2008;2:437-47.

739 [19] Ringrose L, Paro R. Epigenetic regulation of cellular memory by the Polycomb  
740 and Trithorax group proteins. *Annu Rev Genet* 2004;38:413-43.

741 [20] Mikkelsen, TS, Ku M, Jaffe DB, Issac B, Lieberman E, Giannoukos G, et al.  
742 Genome-wide maps of chromatin state in pluripotent and lineage-committed cells.  
743 *Nature* 2007;448:553-60.

744 [21] Brien GL, Gambero G, O'Connell DJ, Jerman E, Turner SA, Egan CM, et al.  
745 Polycomb PHF19 binds H3K36me3 and recruits PRC2 and demethylase NO66 to  
746 embryonic stem cell genes during differentiation. *Nat Struct Mol Biol*  
747 2012;19:1273-81.

748 [22] Zhang Y, Xie S, Zhou Y, Xie Y, Liu P, Sun M, et al. H3K36 histone  
749 methyltransferase Setd2 is required for murine embryonic stem cell differentiation  
750 toward endoderm. *Cell Rep* 2014;8: 1989-2002.

751 [23] Kolasinska-Zwierz P, Down T, Latorre I, Liu T, Liu XS, Ahringer J. Differential  
752 chromatin marking of introns and expressed exons by H3K36me3. *Nat Genet*  
753 2009;41:376-81.

754 [24] Vermeulen M, Eberl HC, Matarese F, Marks H, Denissov S, Butter F, et al.  
755 Quantitative interaction proteomics and genome-wide profiling of epigenetic histone  
756 marks and their readers. *Cell* 2010;142:967-80.

757 [25] Vezzoli A, Bonadies N, Allen MD, Freund SM, Santiveri CM, Kvinlaug BT, et al.  
758 Molecular basis of histone H3K36me3 recognition by the PWWP domain of Brpf1.  
759 *Nat Struct Mol Biol* 2010;17: 617-9.

760 [26] Wu H, Zeng H, Lam R, Tempel W, Amaya MF, Xu C, et al. Structural and

761 histone binding ability characterizations of human PWWP domains. *PLoS One*  
762 2011;6:e18919.

763 [27] van Nuland R, van Schaik FMA, Simonis M, van Heesch S, Cuppen E, Boelens  
764 R, et al. Nucleosomal DNA binding drives the recognition of H3K36-methylated  
765 nucleosomes by the PSIP1-PWWP domain. *Epigenetics Chromatin* 2013;6(1):12.

766 [28] Fang R, Barbera A, Xu Y, Rutenberg M, Leonor T, Bi Q, et al. Human  
767 LSD2/KDM1b/AOF1 regulates gene transcription by modulating intragenic  
768 H3K4me2 methylation. *Mol Cell* 2010;39: 222-33.

769 [29] Fang R, Chen F, Dong Z, Hu D, Barbera AJ, Clark EA, et al. LSD2/KDM1B and  
770 its cofactor NPAC/GLYR1 endow a structural and molecular model for regulation of  
771 H3K4 demethylation. *Mol Cell* 2013;49:558-70.

772 [30] Marabelli C, Marrocco B, Pilotto S, Chittori S, Picaud S, Marchese S, et al.  
773 Tail-based mechanism drives nucleosome demethylation by the LSD2/NPAC  
774 multimeric complex. *Cell Rep* 2019;27:387-99.

775 [31] Niwa H, Miyazaki J, Smith AG. Quantitative expression of Oct-3/4 defines  
776 differentiation, dedifferentiation or self-renewal of ES cells. *Nat Genet*  
777 2000;24:372-6.

778 [32] Leahy A, Xiong JW, Kuhnert F, Stuhlmann H. Use of developmental marker  
779 genes to define temporal and spatial patterns of differentiation during embryoid body  
780 formation. *J Exp Zool* 1999;284:67-81.

781 [33] Kim JB, Zaehres H, Wu G, Gentile L, Ko K, Sebastiano V, et al. Pluripotent stem  
782 cells induced from adult neural stem cells by reprogramming with two factors. *Nature*  
783 2008;454: 646-50.

784 [34] Ying QL, Wray J, Nichols J, Batlle-Morera L, Doble B, Woodgett J, et al. The  
785 ground state of embryonic stem cell self-renewal. *Nature* 2008;453:519-23.

786 [35] Nichols J, Silva J, Roode M, Smith A. Suppression of Erk signalling promotes  
787 ground state pluripotency in the mouse embryo. *Development* 2009;136:3215-22.

788 [36] Yang SH, Kalkan T, Morrisroe C, Smith A, Sharrocks AD. A genome-wide RNAi  
789 screen reveals MAP kinase phosphatases as key ERK pathway regulators during  
790 embryonic stem cell differentiation. *PLoS Genet* 2012;8:e1003112.

- 791 [37] Luo Y, Lim CL, Nichols J, Martinez-Arias A, Wernisch L. Cell signalling  
792 regulates dynamics of Nanog distribution in embryonic stem cell populations. *J R Soc*  
793 *Interface* 2013;10: 20120525.
- 794 [38] Hamilton WB, Kaji K, Kunath T. ERK2 suppresses self-renewal capacity of  
795 embryonic stem cells, but is not required for multi-lineage commitment. *PLoS One*  
796 2013;8:e60907.
- 797 [39] Sims RJ, Belotserkovskaya R, Reinberg D. Elongation by RNA polymerase II:  
798 the short and long of it. *Genes Dev* 2004;18:2437-68.
- 799 [40] Price DH. P-TEFb, a cyclin-dependent kinase controlling elongation by RNA  
800 polymerase II. *Mol Cell Biol* 2000;20:2629-34.
- 801 [41] Bensaude O. Inhibiting eukaryotic transcription. Which compound to choose?  
802 How to evaluate its activity? *Transcription* 2011;2:103-8.
- 803 [42] Liu N, Lu M, Tian X, Han Z. Molecular mechanisms involved in self-renewal  
804 and pluripotency of embryonic stem cells. *J Cell Physiol* 2007;211:279-86.
- 805 [43] Ito S, D'Alessio AC, Taranova OV, Hong K, Sowers LC, Zhang Y. Role of Tet  
806 proteins in 5mC to 5hmC conversion, ES-cell self-renewal and inner cell mass  
807 specification. *Nature* 2010;466:1129-33.
- 808 [44] Ivanova N, Dobrin R, Lu R, Kotenko I, Levorse J, DeCoste C, et al. Dissecting  
809 self-renewal in stem cells with RNA interference. *Nature* 2006;442:533-8.
- 810 [45] Xie L, Pelz C, Wang W, Bashar A, Varlamova O, Shadle S, et al. KDM5B  
811 regulates embryonic stem cell self-renewal and represses cryptic intragenic  
812 transcription. *EMBO J* 2011;30:1473-84.
- 813 [46] Kunath T, Saba-El-Leil MK, Almousailleakh M, Wray J, Meloche S, Smith A.  
814 FGF stimulation of the Erk1/2 signalling cascade triggers transition of pluripotent  
815 embryonic stem cells from self-renewal to lineage commitment. *Development*  
816 2007;134:2895-902.
- 817 [47] Hamilton WB, Brickman JM. Erk signaling suppresses embryonic stem cell  
818 self-renewal to specify endoderm. *Cell Rep* (2014);9:2056-70.
- 819 [48] Hamazaki T, Kehoe SM, Nakano T, Terada N. The Grb2/Mek pathway represses

- 820 Nanog in murine embryonic stem cells. *Mol Cell Biol* 2006;26:7539-49.
- 821 [49] Brambrink T, Foreman R, Welstead GG, Lengner CJ, Wernig M, Suh H, et al.  
822 Sequential expression of pluripotency markers during direct reprogramming of mouse  
823 somatic cells. *Cell Stem Cell* 2008;2:151-9.
- 824 [50] Apostolou E, Hochedlinger K. Chromatin dynamics during cellular  
825 reprogramming. *Nature* 2013;502:462-71.
- 826 [51] Lin T, Ambasudhan R, Yuan X, Li W, Hilcove S, Abujarour R, et al. A chemical  
827 platform for improved induction of human iPS cells. *Nat Methods* 2009;6:805-8.
- 828 [52] Elmore S. Apoptosis: a review of programmed cell death. *Toxicol Pathol*  
829 2007;35:495-516.
- 830 [53] Cagnol S, Chambard JC. ERK and cell death: Mechanisms of ERK-induced cell  
831 death—apoptosis, autophagy and senescence. *FEBS J* 2010;277:2-21.
- 832 [54] Fridman JS, Lowe SW. Control of apoptosis by p53. *Oncogene* 2003;22:9030-40.
- 833 [55] Attardi LD, Reczek EE, Cosmas C, Demicco EG, McCurrach ME, Lowe SW, et  
834 al. PERP, an apoptosis-associated target of p53, is a novel member of the  
835 PMP-22/gas3 family. *Genes Dev* 2000;14:704-18.
- 836 [56] Peterlin BM, Price DH. Controlling the elongation phase of transcription with  
837 P-TEFb. *Mol. Cell* 2006;23:297-305.
- 838 [57] Jang MK, Mochizuki K, Zhou M, Jeong HS, Brady JN, Ozato K. The  
839 bromodomain protein Brd4 is a positive regulatory component of P-TEFb and  
840 stimulates RNA polymerase II-dependent transcription. *Mol Cell* 2005;19:523-34.
- 841 [58] Yu S, Ma H, Ow JR, Goh Z, Chiang R, Yang H, et al. Zfp553 is essential for  
842 maintenance and acquisition of pluripotency. *Stem Cells Dev* 2016;25:55-67.
- 843 [59] Ma H, Ng HM, Teh X, Li H, Lee YH, Chong YM, et al. Zfp322a Regulates  
844 mouse ES cell pluripotency and enhances reprogramming efficiency. *PLoS Genet*  
845 2014;10:e1004038.
- 846 [60] Li H. Toward better understanding of artifacts in variant calling from  
847 high-coverage samples. *Bioinformatics* 2014;30:2843–51.
- 848 [61] Dobin A, Davis CA, Schlesinger F, Drenkow J, Zaleski C, Jha S, et al. STAR:

849 ultrafast universal RNA-seq aligner. *Bioinformatics* 2013;29:15-21.

850 [62] Liao Y, Smyth GK, Shi W. featureCounts: an efficient general purpose program  
851 for assigning sequence reads to genomic features. *Bioinformatics* 2014;30:923-30.

852 [63] Shen L, Shao N, Liu X, Nestler E. ngs. plot: Quick mining and visualization of  
853 next-generation sequencing data by integrating genomic databases. *BMC genomics*  
854 2014;15: 284.

855 [64] Singh J, Padgett RA. Rates of in situ transcription and splicing in large human  
856 genes. *Nat Struct Mol Biol* 2009;16:1128-33.

857 [65] Lemieux B, Blanchette M, Monette A, Mouland AJ, Wellinger RJ, Chabot B. A  
858 function for the hnRNP A1/A2 proteins in transcription elongation. *PLoS One*  
859 2015;10:e0126654.

860

## 861 **Figure Legends**

862 **Figure 1 Npac is required to maintain mESC pluripotency.** **A.** *Npac* mRNA level  
863 was decreased in mES cells cultured in LIF withdrawal ESC medium. The level of the  
864 *Npac* and *Oct4* mRNA were compared to control cells cultured in normal ESC  
865 medium and normalized against  *$\beta$ -actin*. **B.** Levels of pluripotency genes *Oct4*, *Sox2*  
866 and *Nanog* were significantly decreased upon depletion of *Npac*. Two different  
867 shRNAs targeting distinct regions of *Npac* (*Npac* RNAi-1 was shown in Figure 1B  
868 and *Npac* RNAi-2 was shown in Supplementary Figure S1A) were transfected into  
869 mESCs to knockdown *Npac*. mESCs transfected with empty pSUPER.puro vector  
870 were used as control. **C.** Knockdown of *Npac* resulted in decreased protein levels of  
871 *Oct4*, *Sox2*, *Nanog* and histone H3K36me3.  *$\beta$ -actin* served as loading control. **D.**  
872 Depletion of *Npac* caused up-regulation of lineage specific markers for endoderm and  
873 mesoderm. **E.** Representative bright field images (upper panel) of E14 cells  
874 transfected with control RNAi, scrambled RNAi or *Npac* RNAi followed by 4 days  
875 puromycin selection. Alkaline Phosphatase (AP) staining was shown at the bottom  
876 panel. AP staining was conducted on the fourth day of transfection. **F.** Quantification  
877 of AP-positive colonies for control RNAi, scrambled RNAi or *Npac* RNAi transfected

878 E14 cells. Scale bar = 100  $\mu$ m. Specific primers were used to measure gene  
879 expression levels by real-time PCR. Gene expression levels were normalized against  
880  *$\beta$ -actin*. All error bars are mean  $\pm$  SE (n=3). Significance: \* P  $\leq$  0.05, \*\* P  $\leq$  0.01,  
881 \*\*\* P  $\leq$  0.001.

882

883 **Figure 2 Depletion of Npac inhibits the efficiency of reprogramming.** **A.** Npac  
884 mRNA relative expression level was determined by real-time PCR in mouse  
885 embryonic fibroblasts (MEFs) which were infected with OKSM factors (Oct4, Klf4,  
886 Sox2, c-Myc) or OKSM + Npac knockdown retrovirus. RNA was extracted from cells  
887 which were harvested 4 days after virus infection. Gene expression levels were  
888 normalized against  *$\beta$ -actin*. **B.** Depletion of Npac inhibited reprogramming efficiency  
889 process. The numbers of GFP<sup>+</sup> colonies which indicate putative iPSCs were counted  
890 from day 10 to day 14 after virus infection. GFP<sup>+</sup> colonies formed by OKSM factors +  
891 Npac knockdown virus were lower than OKSM control throughout the whole  
892 reprogramming process. **C.** The iPSCs generated from OSKM + Npac knockdown  
893 virus presented weaker alkaline phosphatase activity than OKSM virus. There were  
894 less AP stained colonies generated from OKSM+Npac knockdown compared to  
895 OKSM. **D.** Graphical representation of AP staining results was shown in Figure 2C. **E.**  
896 The iPSCs generated from OKSM plus Npac KD expressed Oct4 and Nanog,  
897 indicating that they were ES-cell like. Immunostaining was performed with anti-Oct4  
898 and anti-Nanog antibodies in GFP<sup>+</sup> iPSCs generated from OKSM+Npac KD. **F.**  
899 Embryoid bodies generated from GFP<sup>+</sup> iPSCs which were induced by OKSM+Npac  
900 KD were able to express ectoderm, mesoderm and endoderm lineage markers.  
901 Embryoid bodies were stained with anti-Gata4, anti-alpha smooth muscle actin (SMA)  
902 and anti-Nestin antibodies. DAPI (blue) served as nucleus marker. Scale bar = 100  
903  $\mu$ m.

904

905 **Figure 3 Changes of global gene expression upon Npac depletion in mouse ESCs.**  
906 **A.** Microarray heat map generated from relative gene expression levels. Relative  
907 highly expressed genes were shown in red and low expressed genes in green. *Npac*

908 was knocked down in E14 cells and selected for 96 hours. Then whole genome cDNA  
909 microarray hybridization was performed. Duplicates were chosen to ensure  
910 reproducibility of results. Gene ontology (GO) analysis was performed relating to  
911 “biological process” for the up- or down-regulated genes respectively. The enriched  
912 categories were classified into several function groups and listed in the figure. **B.**  
913 Heatmap of down-regulated pluripotency genes upon *Npac* knockdown in mESCs.  
914 Genes were selected according to their known functions in pluripotency. Each  
915 selected gene was taken as individual tiles from the thumbnail-dendrogram duplicates.  
916 **C.** Heatmap of up-regulated MAPK pathway-related genes upon *Npac* knockdown in  
917 mESCs. Genes were selected according to their known functions in MAPK pathway.  
918 **D.** p-ERK1/2 and ERK1/2 protein levels were elevated in *Npac* depleted cells as  
919 compared to control cells.  $\beta$ -actin served as loading control. **E.** ERK inhibitor  
920 triggered elevated expression of *Nanog* while it could not rescue the down-regulated  
921 expression of master pluripotency gene *Oct4* upon *Npac* depletion. **F.** ERK inhibitors  
922 slightly brought down the up-regulated lineage markers in *Npac* knocked-down cells.  
923 Mouse ESCs were transfected with *Npac* RNAi plasmid or control plasmid and 50  
924 nM or 250 nM of ERK inhibitors (PD0325901, Sigma) were added into selection  
925 medium for 4 days followed by RNA extraction.

926

927 **Figure 4 Npac depletion may cause cellular apoptosis.** **A.** Heatmap of up-regulated  
928 cell death related genes upon *Npac* knockdown in mouse ESCs. Genes were selected  
929 according to their known functions in cell death. **B.** Cell cycle analysis by flow  
930 cytometry in *Npac* RNAi cells and control RNAi group. **C.** The representative flow  
931 cytometry pattern is shown. **D.** Apoptosis triggered by *Npac* depletion was analyzed  
932 by Annexin V staining assay through flow cytometry. **E.** Graphical representation of  
933 the apoptosis cells by Annexin V staining assay. Mouse E14 cells were transfected  
934 with *Npac* RNAi or empty plasmid as control. After 96 hours selection, cells were  
935 harvested for cell cycle analysis or Annexin V staining assay followed by flow  
936 cytometry. Error bars were based on three separate experiments.

937



938 **Figure 5 Npac is mainly located to gene bodies and its genome-wide distribution**  
939 **resembles that of histone H3K36me3.** **A.** Schematic diagram at the bottom shows  
940 the primers designed at specific areas upstream and downstream of *Nanog* gene. **B.**  
941 Npac is associated with *Nanog* gene body, with high enrichment fold at gene body of  
942 *Nanog*. Real time PCR primers were designed according to *Nanog* genomic region. **C.**  
943 Npac is also associated with gene bodies of other pluripotency genes including *Tcf15*,  
944 *Prdm14* and *Tcl1*. Real time PCR primers were designed at gene bodies of *Tcf15*,  
945 *Prdm14* and *Tcl1* genomic regions. (D) Genome-wide distributions of Npac in mESCs.  
946 **E.** Genome-wide distribution of Npac resembled that of histone H3K36me3. Both are  
947 enriched at actively transcribed genes while having low or no enrichment in  
948 non-expressed genes in E14 cells. H3K36me3\_express represents H3K36me3 genome  
949 wide distribution in expressed genes in E14 cells; Npac non-express represents Npac  
950 genome distribution in non-expressed genes in E14 cells. **F.** Genome-wide  
951 distribution of Npac and H3K36me3 in genes with different expression levels (high,  
952 middle, low, no). H3K36me3\_high (middle, low, no) represents H3K36me3 genome  
953 wide distribution in mESC genes with high (middle, low, no) expression. Npac high  
954 (middle, low, no) represents Npac genome wide distribution in mESC genes with high  
955 (middle, low, no) expression. Each gene body is represented from 0% (transcriptional  
956 start site; TSS) to 100% (transcriptional termination site; TTS). **G.** Housekeeping  
957 genes (*ACTB*) and pluripotency genes (*Nucleolin*, *Nanog* and *Tcl1*) representatives of  
958 Npac and H3K36me3 ChIP-seq peaks in mESCs. Arrows denote TSS and  
959 transcription orientation. **H.** Telomere maintenance related genes (*Rfc1*, *Terf1* and  
960 *Rpa2*) representatives of Npac and H3K36me3 ChIP-seq peaks in mESCs. Arrows  
961 denote TSS and transcription orientation.

962

963 **Figure 6 Npac could be involved in RNA Pol II transcriptional elongation.** **A.**  
964 Npac interacted with RNA Pol II. Cell lysate of wild type ESCs was  
965 immunoprecipitated using either anti-Npac antibody or anti-RNA Pol II antibody.  
966 Western blot was subsequently carried out with anti-RNA Pol II antibody or anti-Npac  
967 antibody. **B.** Npac can be pulled down with RNA Pol II Ser5P. **C.** Npac was

968 associated with RNA Pol II Ser2. **D.** *Npac* depletion led to down-regulation of RNA  
969 Pol II Ser2 while protein levels of RNA Pol II Ser5 and total RNA Pol II were not  
970 affected.  $\beta$ -actin served as loading control. The binding of RNA Pol II at gene bodies  
971 of *Nanog* (**E**) and *Rif1* (**F**) were significantly reduced in *Npac* depleted cells. The  
972 binding of RNA Pol II Ser2 at gene bodies of *Nanog* (**G**) and *Rif1* (**H**) were  
973 significantly reduced in *Npac* depleted cells. Histone H3K36me3 binding to  
974 pluripotency genes *Nanog* (**I**) and *Rif1* (**J**) was significantly reduced compared to  
975 control.

976

977 **Figure 7 *Npac* interacts with positive transcriptional elongation factor (p-TEFb)**  
978 **and *Npac* depletion may lead to transcriptional elongation defect.** **A.** *Npac*  
979 interacts with Cdk9. **B.** *Npac* is associated with Cyclin T1. Control IP was performed  
980 using anti-IgG antibody. **C.** Elongation recovery assay process. After E14 cells were  
981 transfected with *Npac* RNAi or control RNAi for 24 hours, 100  $\mu$ M DRB was applied  
982 and followed by 3 hours incubation, washed twice with PBS and incubated in fresh  
983 medium before total RNA was extracted in every 5 minutes. **D.** *Npac* knockdown  
984 efficiency was not affected with the addition of DRB in *Npac* depleted cells. *Npac*  
985 mRNA expression was detected by real time PCR and expression levels were  
986 normalized against  $\beta$ -actin. **E.** The analyzed regions of *Nanog* were shown  
987 schematically in the map in E. (**F**) & (**G**) Changes in the rate of transcription of  
988 different portions of *Nanog* upon depletion of *Npac*. **H.** The analyzed regions of *Rif1*  
989 were shown schematically in the map in (H). (**I**) & (**J**) Changes in the rate of  
990 transcription of different regions of *Rif1* upon depletion of *Npac*. The recovery of  
991 transcription was assessed at different positions. Each graph illustrates the RNA levels  
992 at different regions of *Rif1* at different recovery time after DRB block was released.  
993 The graphs represent averages of three independent experiments and standard  
994 deviations were provided.

995

996 **Figure 8 Model depicting the role of *Npac* in pluripotency.** **A.** In normal mouse ES  
997 cells, *Npac* is expressed at high level and histone H3K36me3 is enriched in the gene

998 bodies of actively transcribed genes. *Npac* interacts with RNA Pol II Ser2 and recruits  
999 p-TEFb to promote productive elongation. **B.** In *Npac* depleted cells, reduction of  
1000 *Npac* leads to reduced enrichment of Pol II Ser2 and histone H3K36me3 at  
1001 pluripotency genes, thus blocking productive transcriptional elongation.

1002

## 1003 **Supplementary material**

1004

1005 **Supplementary Figure S1 *Npac* is essential for mESC pluripotency.** **A.** mRNA  
1006 levels of pluripotency genes *Oct4*, *Sox2* and *Nanog* were slightly repressed upon  
1007 depletion of *Npac* with *Npac* RNAi-2. *Npac* RNAi-2 was transfected into mESCs to  
1008 knockdown *Npac*. ESCs transfected with empty pSUPER.puro vector were used as a  
1009 control. **B.** Representative bright field images (upper panel) and AP staining pictures  
1010 (lower panel) of *Npac* RNAi rescue experiment. E14 cells were transfected with  
1011 control RNAi or *Npac* RNAi first and followed by puromycin selection for 2 days.  
1012 Then those transfected cells were rescued by transfection of *Npac*-Immune OE  
1013 plasmid followed by neomycin and puromycin selection for 3 days. Cells transfected  
1014 with control empty vector were control group. Alkaline phosphatase (ALP) staining  
1015 was conducted. Scale bar = 100um. **C.** RNA isolation and qRT-PCR were performed  
1016 to compare gene expression levels of pluripotency marker genes and *Npac* after *Npac*  
1017 RNAi rescue. Gene expression levels were normalized against *β-actin*. **D.**  
1018 Representative bright fields and Alkaline Phosphatase (AP) staining images of EBs  
1019 generated from E14 transfected with control RNAi or *Npac* RNAi. **E.** Gene  
1020 expression of lineage markers in EBs was determined by qRT-PCR. Embryoid bodies  
1021 were generated by culturing them in low-attachment culture plates for 14 days. AP  
1022 staining was conducted at day 14 and EBs were harvested in 14th day for RNA  
1023 isolation and qRT-PCR. **F&G.** Pluripotency genes were sustained in *Npac* OE EBs. **H.**  
1024 Representative bright fields and AP staining results of EBs generated from control or  
1025 *Npac* OE E14 cells.

1026

1027 **Supplementary Figure S2 Validation of *Npac* RNAi gene expression microarray**

1028 **data.** Specific primers were designed to check the respective gene expression levels  
1029 of randomly selected down-regulated (**A**) and up-regulated (**B**) genes upon *Npac*  
1030 knockdown in mouse ESCs. Gene expression were normalised against *β-actin*.

1031

1032 **Supplementary Figure S3 Erk inhibitor (PD0325901) is able to block MAPK**  
1033 **pathway.** mESCs (E14 cells) were incubated with 50 nM or 250 nM Erk inhibitor for  
1034 24 hours and DMSO was added into E14 cells as control. Western blot was performed  
1035 using anti-p-Erk antibody. *β-actin* served as control.

1036

1037 **Supplementary Figure S4 Npac has low enrichment at mouse Pou5f1 genomic**  
1038 **region. A.** Schematic diagram at the bottom showed the primer locations at *Pou5f1*  
1039 genomic region (CR1-4 refer to conserved region 1-4). **B.** Real-time PCR result  
1040 showed that fold enrichment of Npac ChIP at *Pou5f1* region was lower than 2.

1041

1042 **Supplementary Figure S5 Comparison between Npac genomic distribution with**  
1043 **that that of several histone modifications, histone modifiers and ESC-enriched**  
1044 **transcription factors. A.** Average whole genome profiles of Npac showed  
1045 completely opposite to that of H3K4me2. **B.** Representatives heatmap of Npac and  
1046 histone modifications (H3K9me3, H3K27me3 and H3K4me3). **C.** Representatives  
1047 heatmap of Npac and histone modifiers of H3K9me3, H3K27me3 and H3K4me3:  
1048 Eset, EZH2 and MLL2. **D.** Representatives heatmap of Npac and ESC-enriched  
1049 transcription factors (Nanog, Oct4 and Sox2).

1050

1051 **Supplementary Figure S6 Genomic distribution of Npac and histone H3K36me3**  
1052 **in up-regulated genes upon Npac knockdown showed very low ChIP-seq signal.**  
1053 Npac and H3K36me3 ChIP-seq peaks at (**A**) developmental genes (*Csf1*, *Dkk1*, *Cryab*,  
1054 *Hspb2*, *Wisp1* and *Gata3*), (**B**) MAPK pathway related genes (*Jun*, *Fas*, *Egfr* and  
1055 *Map3k8*), (**C**) Cell death related genes (*Mmd*, *Cd28*, *Cstb* and *Krt8*) were shown.

1056

1057 **Supplementary Figure S7 Differences of the binding of RNA Pol II at different**

1058 **gene regions.** The binding of RNA Pol II (**A**) and RNA Pol II Ser2 (**B**) at gene bodies  
1059 of *Utrn* were not affected in *Npac* depleted cells compared to control. The binding of  
1060 RNA Pol II Ser5 at gene bodies of *Nanog* (**C**) and *Rif1* (**D**) were not significantly  
1061 affected upon *Npac* depletion.

1062

1063 **Supplementary Table S1 Sequences of used primers.**

1064

1065 **Supplementary Table S2 Global expression gene changes upon *Npac* RNAi**  
1066 (cutoff at 1.5 fold change)

1067

1068 **Supplementary Table S3 Gene ontology analysis of altered genes upon *Npac***  
1069 **RNAi** (p<0.05)

1070

1071 **Supplementary Table S4 Global genomic sites of *Npac* in mESCs.**

1072

1073 **Supplementary Table S5 Gene ontology analysis of *Npac* ChIP-seq targets.**

1074

**A**

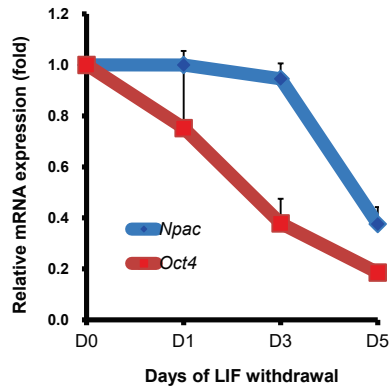

**B**

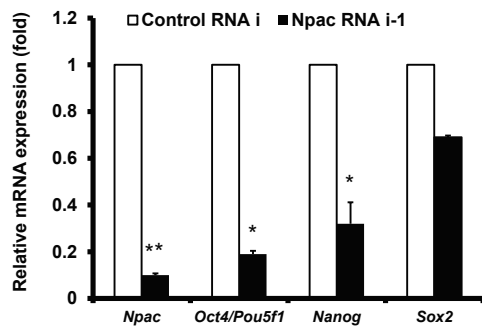

**C**

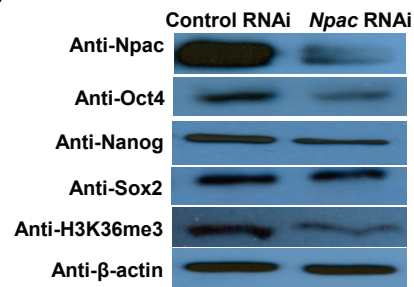

**D**

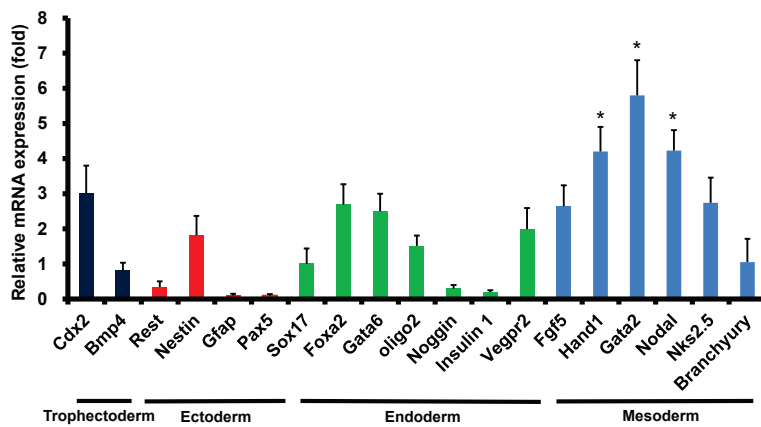

**E**

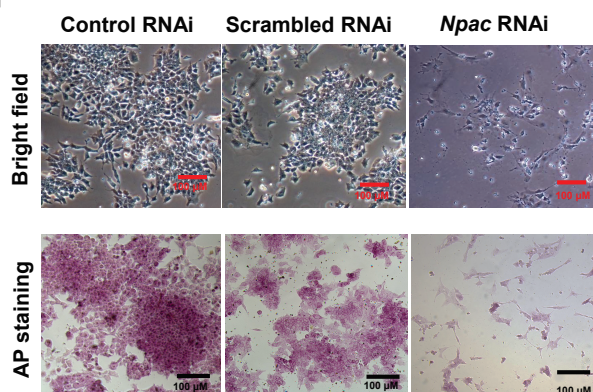

**F**

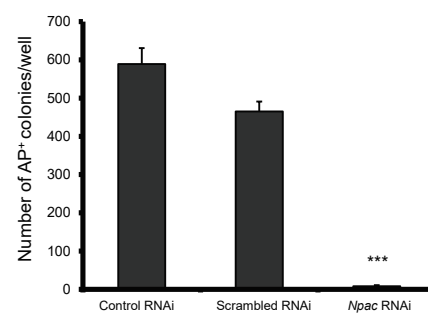

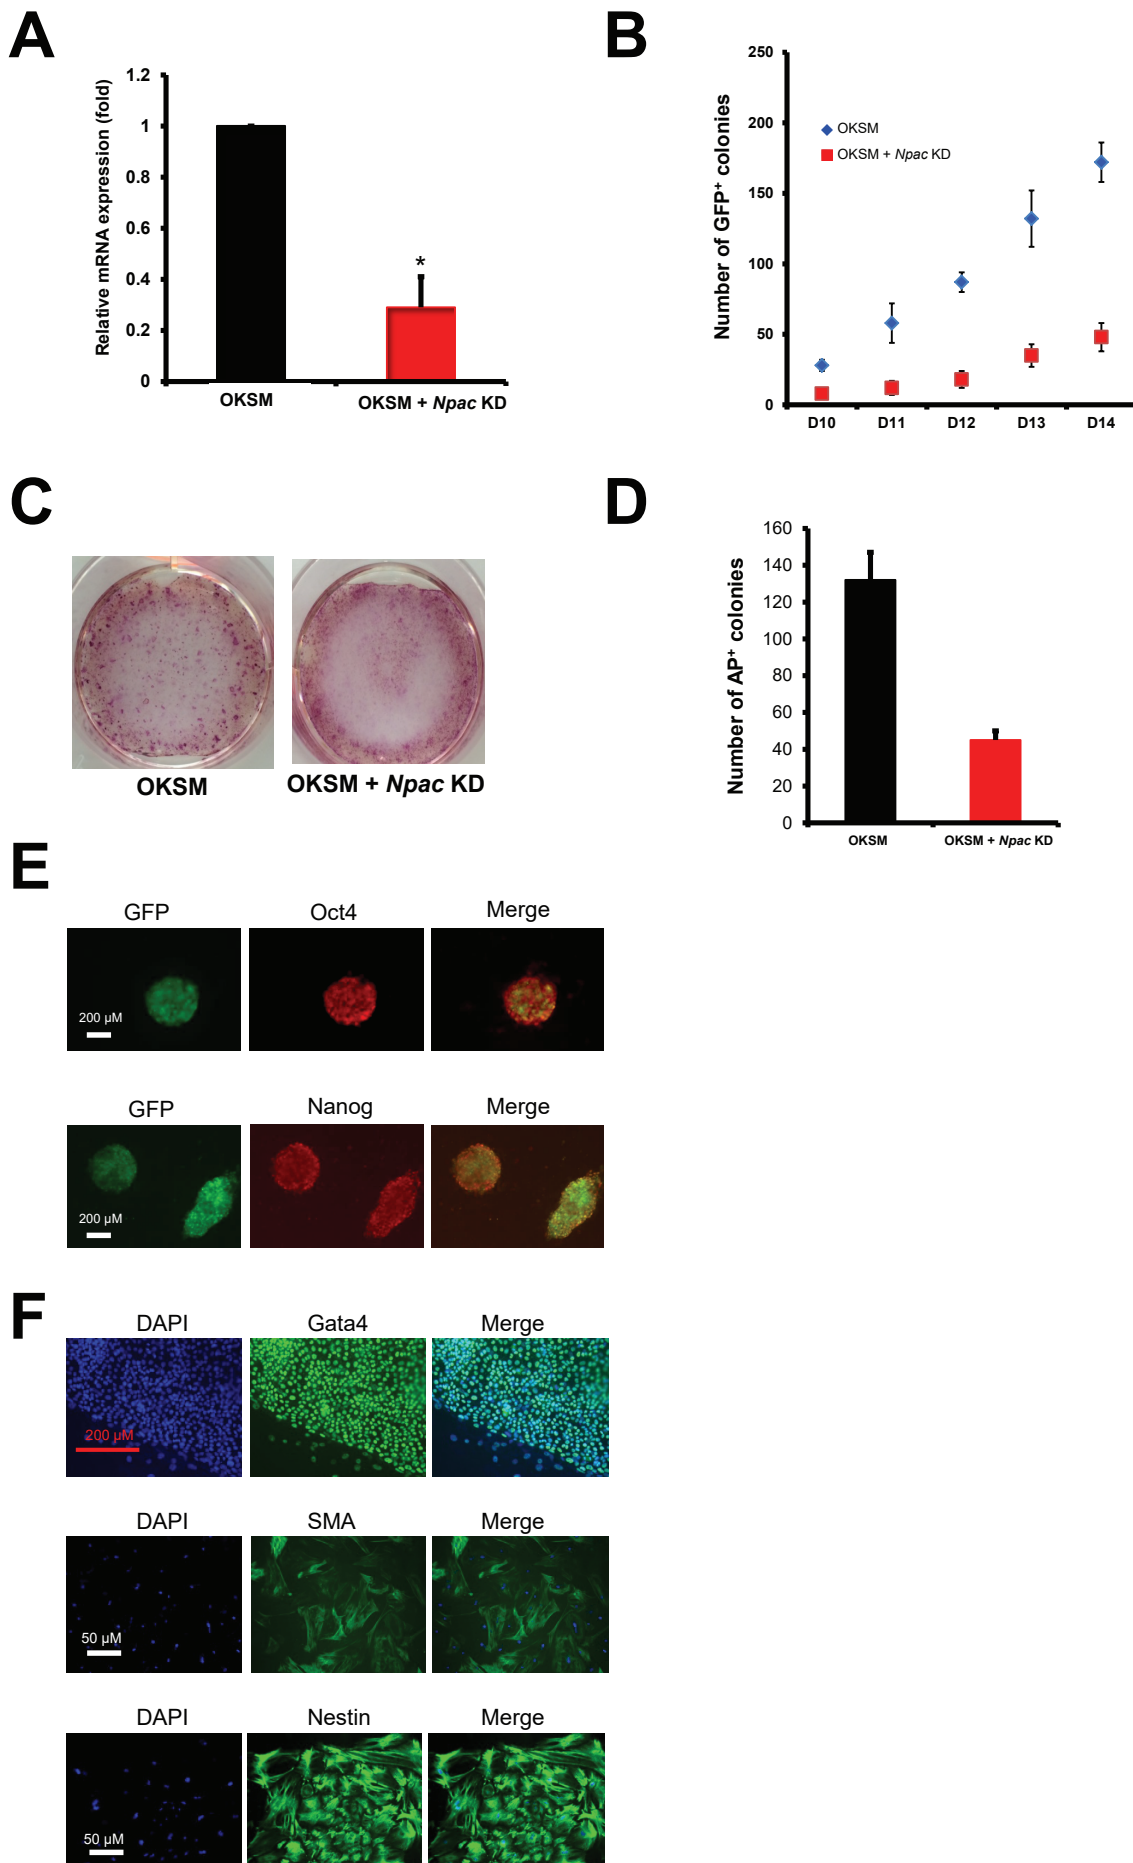

**A**

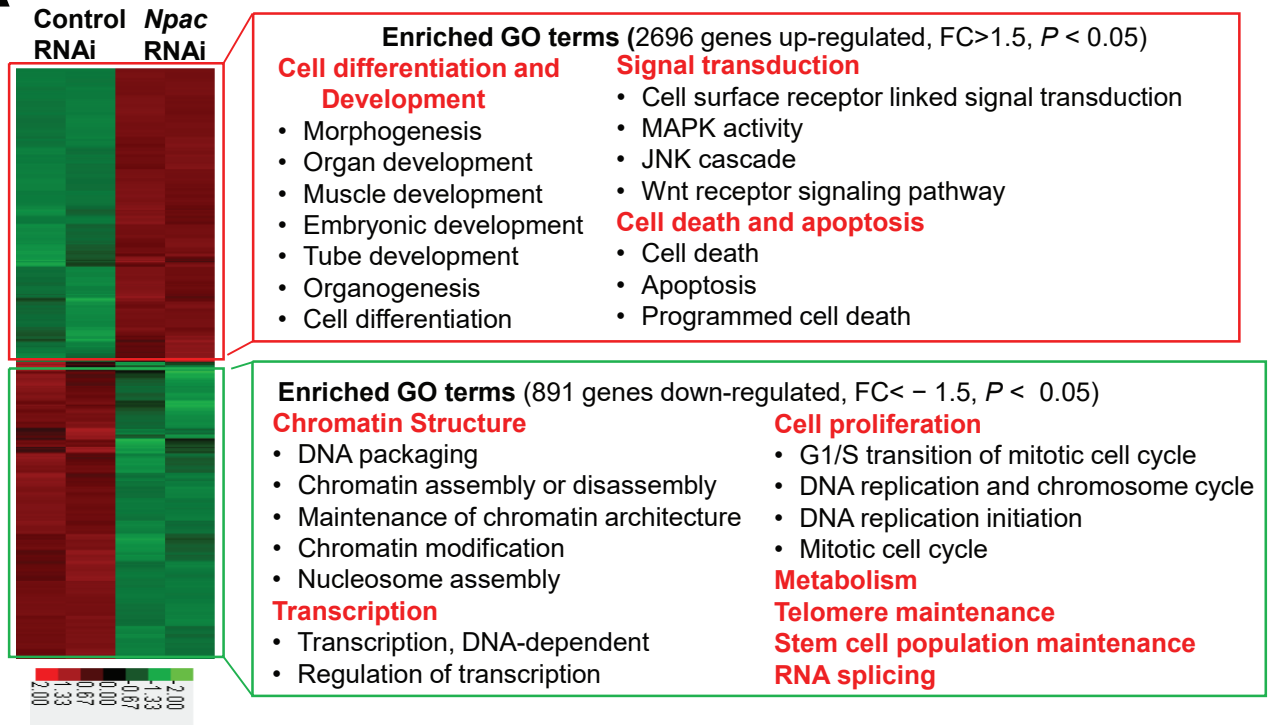

**B**

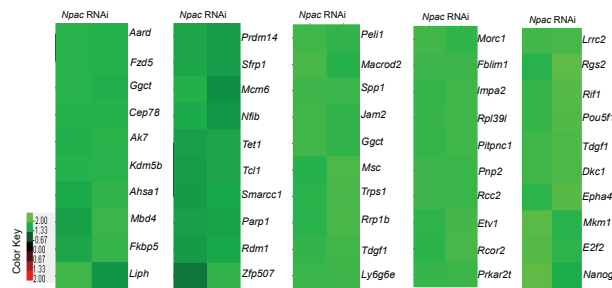

**C**

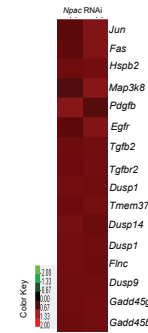

**D**

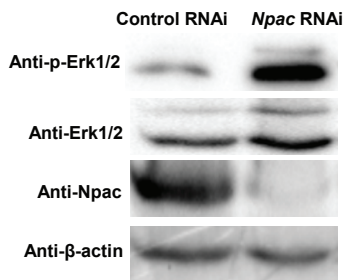

**E**

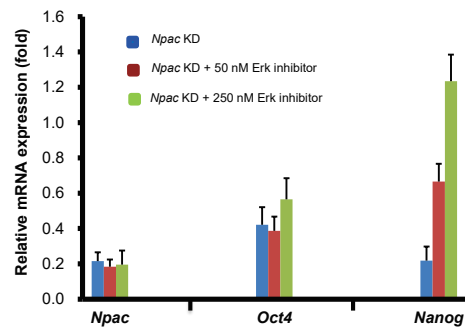

**F**

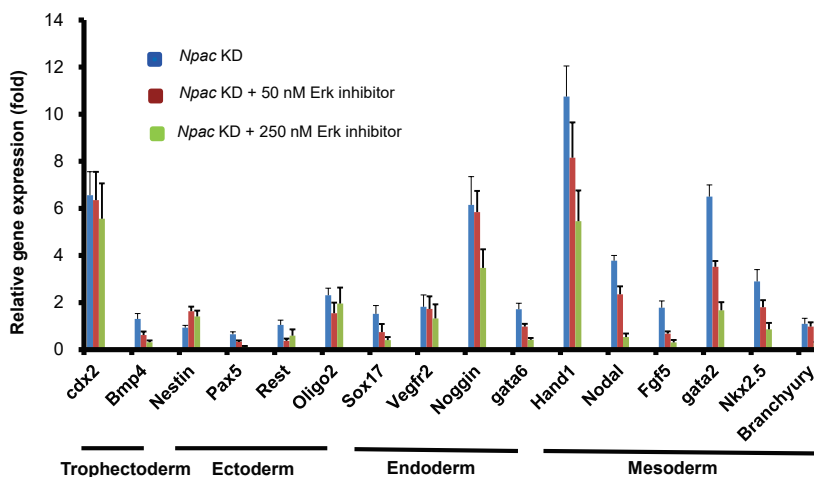



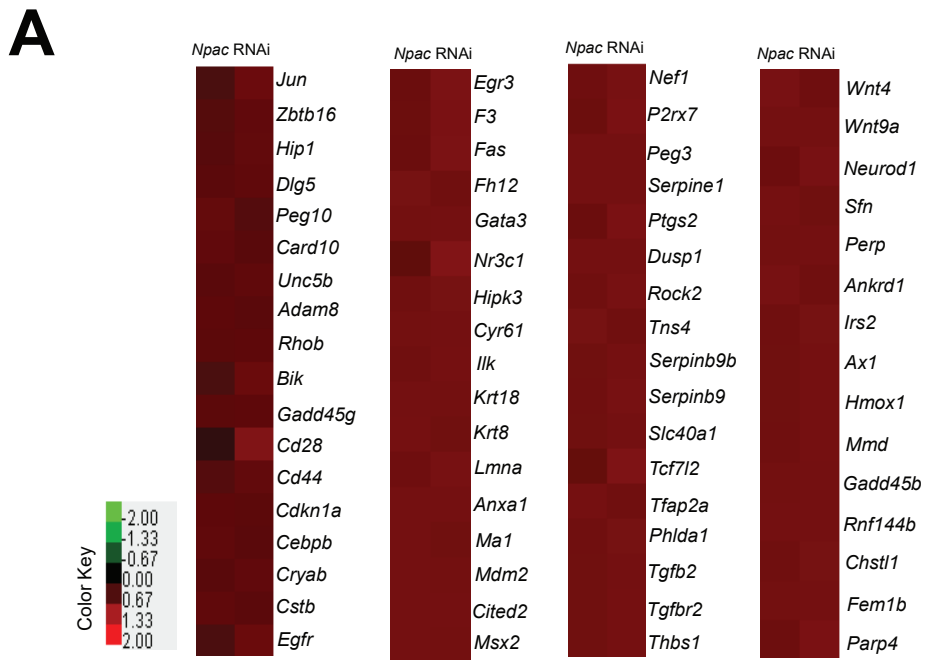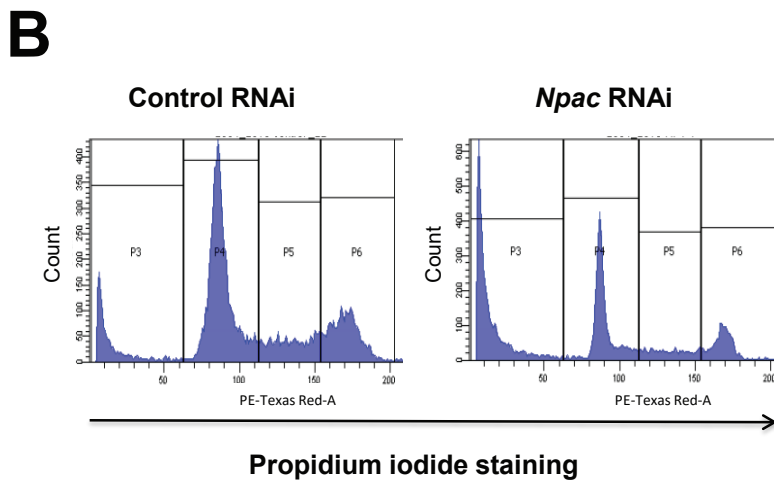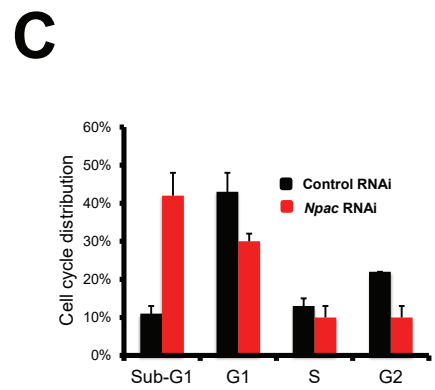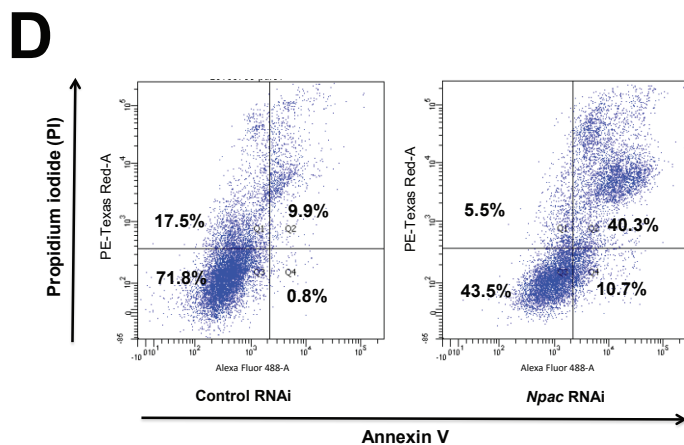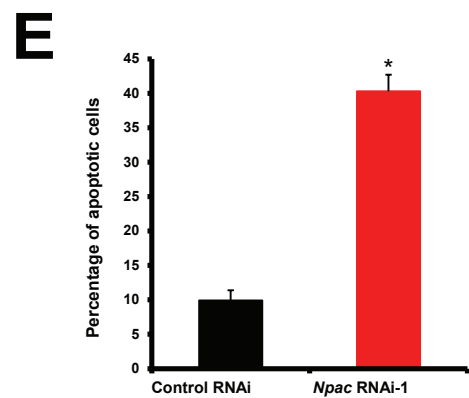

**A**

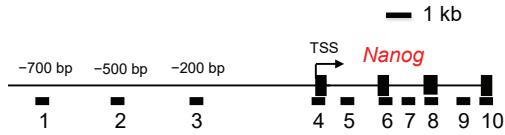

**B**

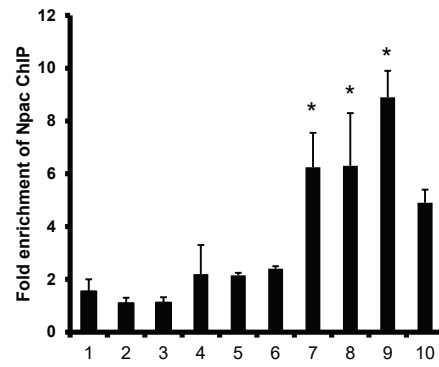

**C**

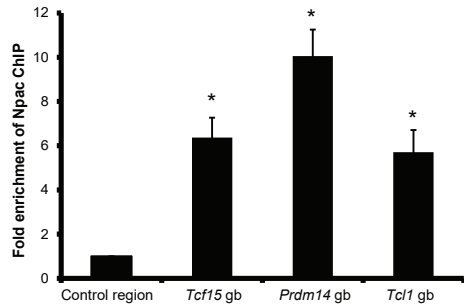

**D**

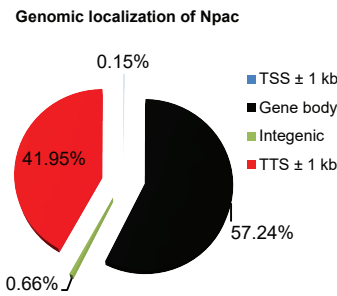

**E**

Genome-wide distribution of Npac resembles that of histone H3K36me3

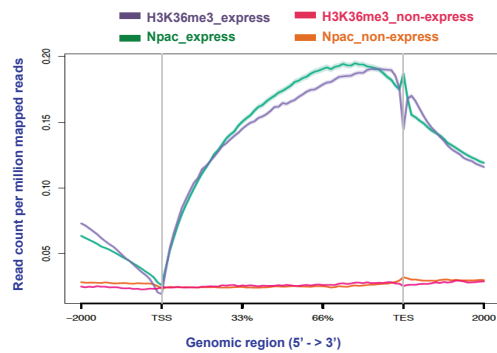

**F**

Genome-wide distribution of Npac and H3K36me3 in genes with different expression levels

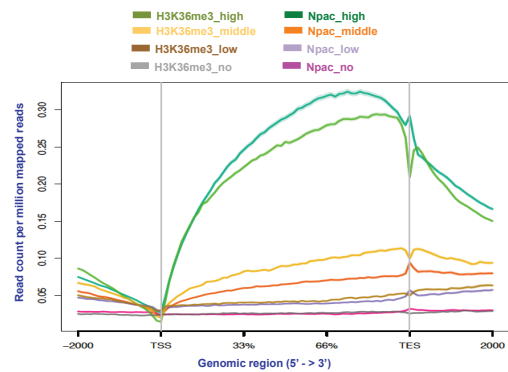

**G**

Npac co-localizes with H3K36me3 in gene body of pluripotency genes

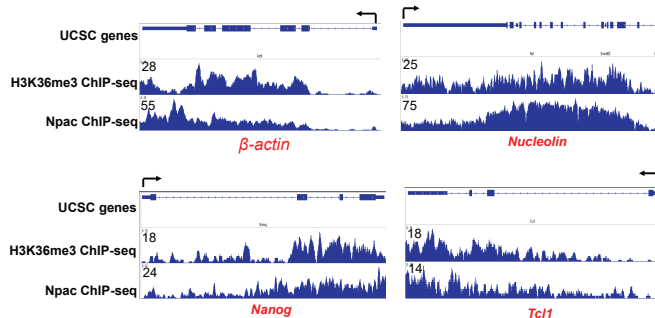

**H**

Npac co-localizes with H3K36me3 in gene body of housekeeping genes

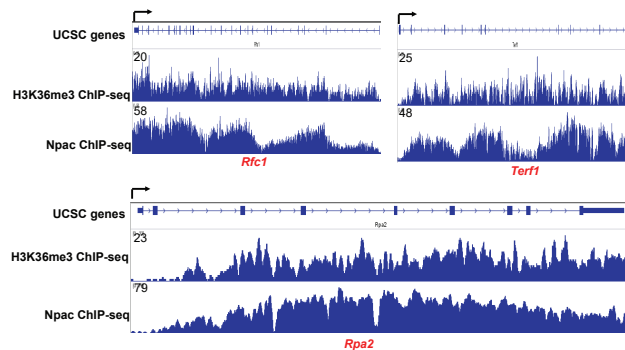

**A**

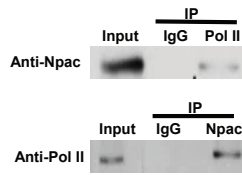

**B**

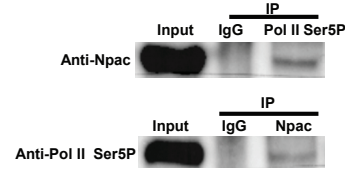

**C**

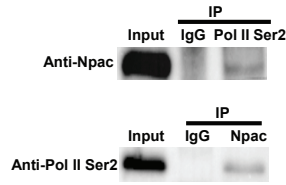

**D**

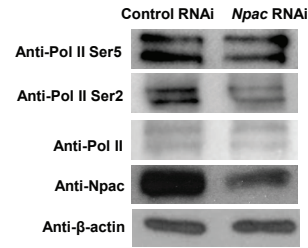

**E**

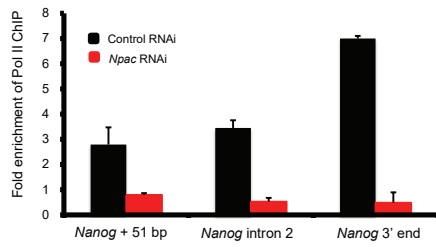

**F**

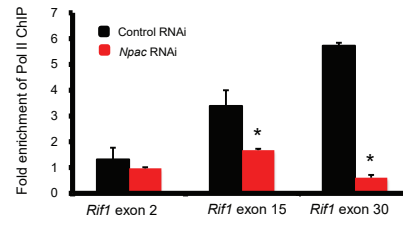

**G**

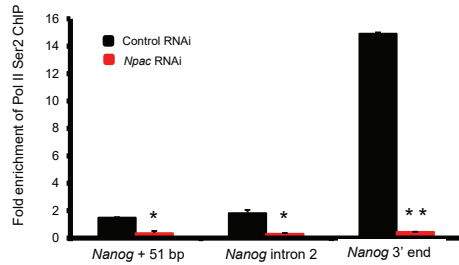

**H**

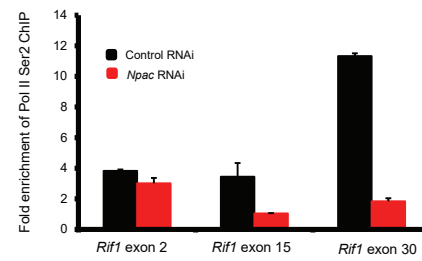

**I**

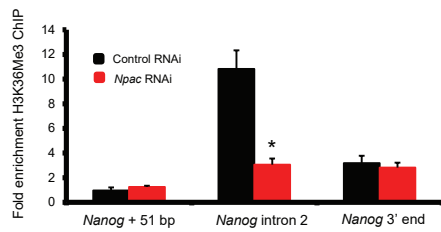

**J**

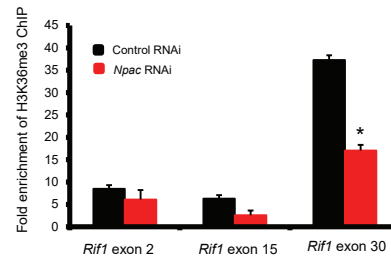

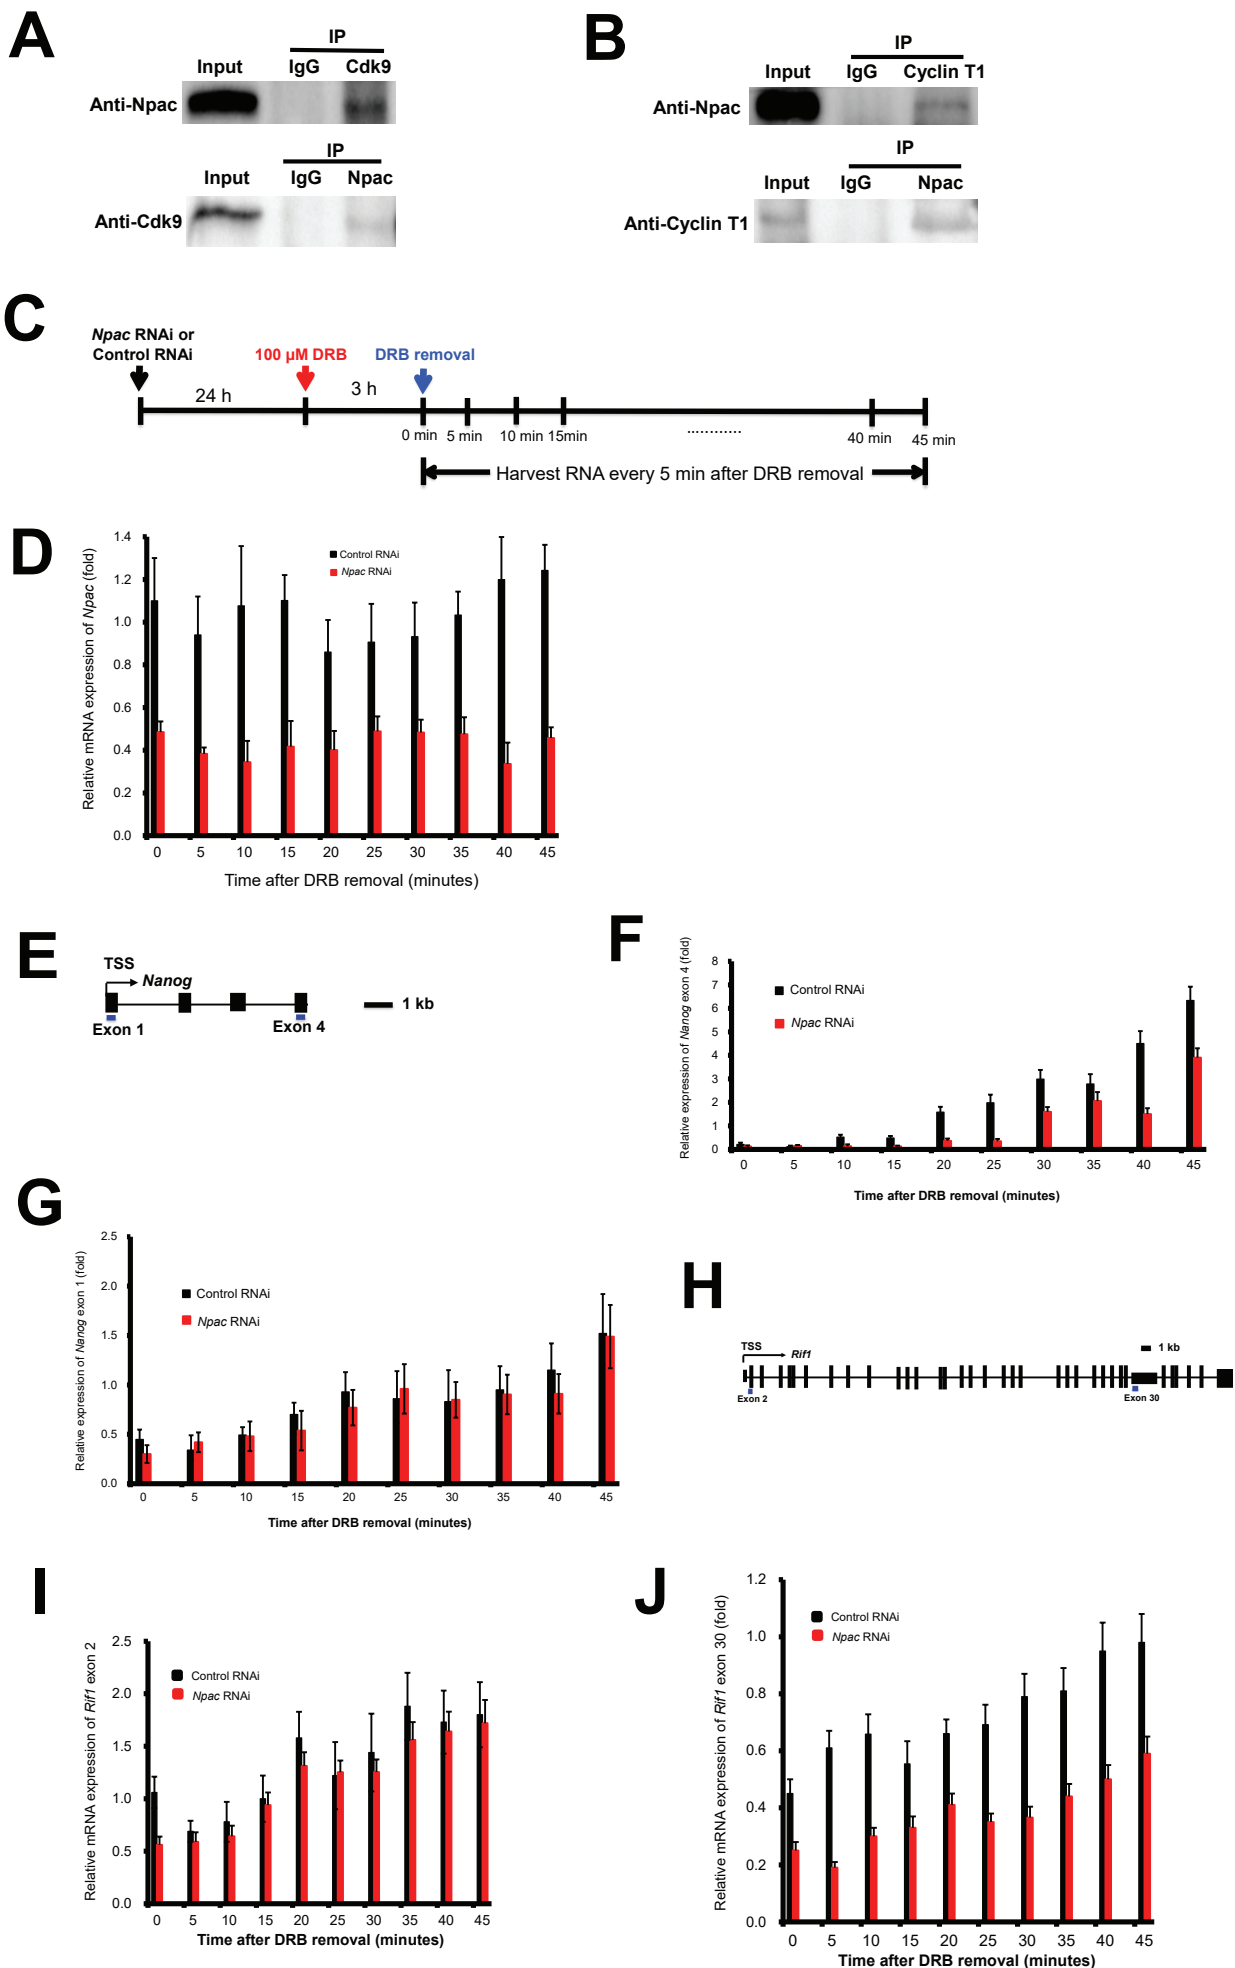

## A Normal mESCs

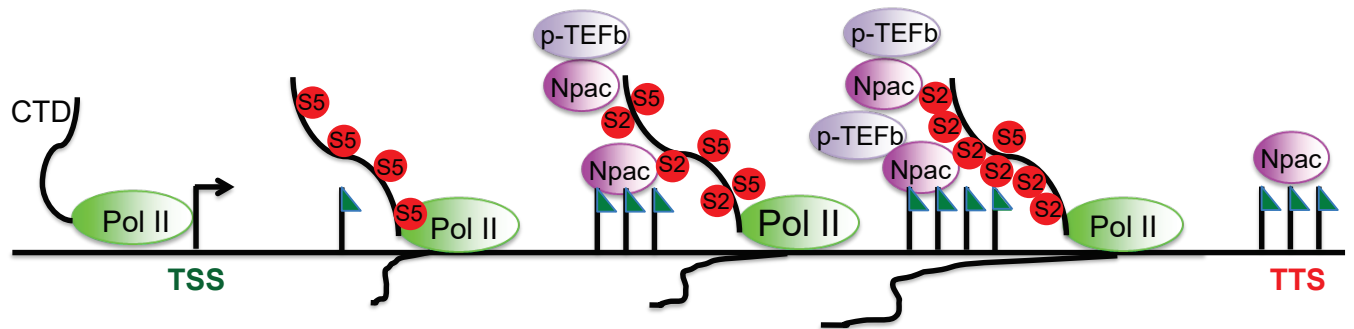

## B Npac depleted mESCs

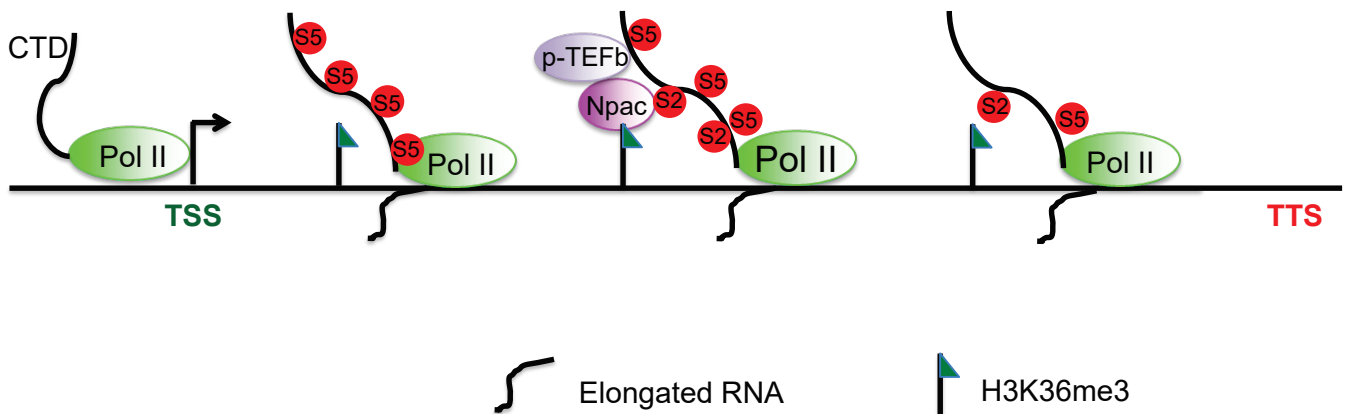

Source: https://biorxiv.org/content/10.1101/2020.07.16.205989v1.full.pdf
